# Supplementary material
Source: publisher figshare collection journal article supplement (https://rs.figshare.com/ndownloader/files/24529537)
Supplement: Supplementary file 1 [file 24529537]

## Sheet: Table S3
Table S3. The complete list of 195 genes tested in IMPC.
Gene	Phenotype	Parameter	Data
Aak1	increased or absent threshold for auditory brainstem response	12kHz-evoked ABR Threshold	http://www.mousephenotype.org/data/charts?accession=MGI:1098687&allele_accession_id=MGI:5766745&zygosity=homozygote&parameter_stable_id=IMPC_ABR_006_001&pipeline_stable_id=ICS_001&phenotyping_center=ICS
Aak1	increased or absent threshold for auditory brainstem response	18kHz-evoked ABR Threshold	http://www.mousephenotype.org/data/charts?accession=MGI:1098687&allele_accession_id=MGI:5766745&zygosity=homozygote&parameter_stable_id=IMPC_ABR_008_001&pipeline_stable_id=ICS_001&phenotyping_center=ICS
Aak1	increased or absent threshold for auditory brainstem response	24kHz-evoked ABR Threshold	http://www.mousephenotype.org/data/charts?accession=MGI:1098687&allele_accession_id=MGI:5766745&zygosity=homozygote&parameter_stable_id=IMPC_ABR_010_001&pipeline_stable_id=ICS_001&phenotyping_center=ICS
Aak1	increased or absent threshold for auditory brainstem response	30kHz-evoked ABR Threshold	http://www.mousephenotype.org/data/charts?accession=MGI:1098687&allele_accession_id=MGI:5766745&zygosity=homozygote&parameter_stable_id=IMPC_ABR_012_001&pipeline_stable_id=ICS_001&phenotyping_center=ICS
Aak1	increased or absent threshold for auditory brainstem response	6kHz-evoked ABR Threshold	http://www.mousephenotype.org/data/charts?accession=MGI:1098687&allele_accession_id=MGI:5766745&zygosity=homozygote&parameter_stable_id=IMPC_ABR_004_001&pipeline_stable_id=ICS_001&phenotyping_center=ICS
Acsl4	increased or absent threshold for auditory brainstem response	30kHz-evoked ABR Threshold	http://www.mousephenotype.org/data/charts?accession=MGI:1354713&allele_accession_id=MGI:4431605&zygosity=homozygote&parameter_stable_id=IMPC_ABR_012_001&pipeline_stable_id=MGP_001&phenotyping_center=WTSI
Adamts15	increased or absent threshold for auditory brainstem response	18kHz-evoked ABR Threshold	http://www.mousephenotype.org/data/charts?accession=MGI:2449569&allele_accession_id=MGI:5569072&zygosity=homozygote&parameter_stable_id=IMPC_ABR_008_001&pipeline_stable_id=UCD_001&phenotyping_center=UC Davis
Adgrb1	increased or absent threshold for auditory brainstem response	6kHz-evoked ABR Threshold	http://www.mousephenotype.org/data/charts?accession=MGI:1933736&allele_accession_id=MGI:5006776&zygosity=homozygote&parameter_stable_id=IMPC_ABR_004_001&pipeline_stable_id=MGP_001&phenotyping_center=WTSI
Adgrb1	increased or absent threshold for auditory brainstem response	12kHz-evoked ABR Threshold	http://www.mousephenotype.org/data/charts?accession=MGI:1933736&allele_accession_id=MGI:5006776&zygosity=homozygote&parameter_stable_id=IMPC_ABR_006_001&pipeline_stable_id=MGP_001&phenotyping_center=WTSI
Adgrb1	increased or absent threshold for auditory brainstem response	24kHz-evoked ABR Threshold	http://www.mousephenotype.org/data/charts?accession=MGI:1933736&allele_accession_id=MGI:5006776&zygosity=homozygote&parameter_stable_id=IMPC_ABR_010_001&pipeline_stable_id=MGP_001&phenotyping_center=WTSI
Adgrb1	increased or absent threshold for auditory brainstem response	30kHz-evoked ABR Threshold	http://www.mousephenotype.org/data/charts?accession=MGI:1933736&allele_accession_id=MGI:5006776&zygosity=homozygote&parameter_stable_id=IMPC_ABR_012_001&pipeline_stable_id=MGP_001&phenotyping_center=WTSI
Adgrb1	increased or absent threshold for auditory brainstem response	18kHz-evoked ABR Threshold	http://www.mousephenotype.org/data/charts?accession=MGI:1933736&allele_accession_id=MGI:5006776&zygosity=homozygote&parameter_stable_id=IMPC_ABR_008_001&pipeline_stable_id=MGP_001&phenotyping_center=WTSI
Adgrb1	increased or absent threshold for auditory brainstem response	Click-evoked ABR threshold	http://www.mousephenotype.org/data/charts?accession=MGI:1933736&allele_accession_id=MGI:5006776&zygosity=homozygote&parameter_stable_id=IMPC_ABR_002_001&pipeline_stable_id=MGP_001&phenotyping_center=WTSI
Adgrv1	increased or absent threshold for auditory brainstem response	12kHz-evoked ABR Threshold	http://www.mousephenotype.org/data/charts?accession=MGI:1274784&allele_accession_id=MGI:5695890&zygosity=homozygote&parameter_stable_id=IMPC_ABR_006_001&pipeline_stable_id=UCD_001&phenotyping_center=UC Davis
Adgrv1	increased or absent threshold for auditory brainstem response	6kHz-evoked ABR Threshold	http://www.mousephenotype.org/data/charts?accession=MGI:1274784&allele_accession_id=MGI:5695890&zygosity=homozygote&parameter_stable_id=IMPC_ABR_004_001&pipeline_stable_id=UCD_001&phenotyping_center=UC Davis
Adgrv1	increased or absent threshold for auditory brainstem response	18kHz-evoked ABR Threshold	http://www.mousephenotype.org/data/charts?accession=MGI:1274784&allele_accession_id=MGI:5695890&zygosity=homozygote&parameter_stable_id=IMPC_ABR_008_001&pipeline_stable_id=UCD_001&phenotyping_center=UC Davis
Adgrv1	increased or absent threshold for auditory brainstem response	30kHz-evoked ABR Threshold	http://www.mousephenotype.org/data/charts?accession=MGI:1274784&allele_accession_id=MGI:5695890&zygosity=homozygote&parameter_stable_id=IMPC_ABR_012_001&pipeline_stable_id=UCD_001&phenotyping_center=UC Davis
Adgrv1	increased or absent threshold for auditory brainstem response	24kHz-evoked ABR Threshold	http://www.mousephenotype.org/data/charts?accession=MGI:1274784&allele_accession_id=MGI:5695890&zygosity=homozygote&parameter_stable_id=IMPC_ABR_010_001&pipeline_stable_id=UCD_001&phenotyping_center=UC Davis
Aff3	increased or absent threshold for auditory brainstem response	Click-evoked ABR threshold	http://www.mousephenotype.org/data/charts?accession=MGI:106927&allele_accession_id=MGI:4434291&zygosity=homozygote&parameter_stable_id=IMPC_ABR_002_001&pipeline_stable_id=MGP_001&phenotyping_center=WTSI
Aff3	increased or absent threshold for auditory brainstem response	6kHz-evoked ABR Threshold	http://www.mousephenotype.org/data/charts?accession=MGI:106927&allele_accession_id=MGI:4434291&zygosity=homozygote&parameter_stable_id=IMPC_ABR_004_001&pipeline_stable_id=MGP_001&phenotyping_center=WTSI
Ahrr	increased or absent threshold for auditory brainstem response	30kHz-evoked ABR Threshold	http://www.mousephenotype.org/data/charts?accession=MGI:1333776&allele_accession_id=MGI:5443922&zygosity=homozygote&parameter_stable_id=IMPC_ABR_012_001&pipeline_stable_id=JAX_001&phenotyping_center=JAX
Ahsg	increased or absent threshold for auditory brainstem response	30kHz-evoked ABR Threshold	http://www.mousephenotype.org/data/charts?accession=MGI:107189&allele_accession_id=MGI:5548370&zygosity=homozygote&parameter_stable_id=IMPC_ABR_012_001&pipeline_stable_id=UCD_001&phenotyping_center=UC Davis
Ahsg	increased or absent threshold for auditory brainstem response	24kHz-evoked ABR Threshold	http://www.mousephenotype.org/data/charts?accession=MGI:107189&allele_accession_id=MGI:5548370&zygosity=homozygote&parameter_stable_id=IMPC_ABR_010_001&pipeline_stable_id=UCD_001&phenotyping_center=UC Davis
Akr1c12	increased or absent threshold for auditory brainstem response	24kHz-evoked ABR Threshold	http://www.mousephenotype.org/data/charts?accession=MGI:1351661&allele_accession_id=MGI:5692634&zygosity=homozygote&parameter_stable_id=IMPC_ABR_010_001&pipeline_stable_id=IMPC_001&phenotyping_center=MARC
Aldh1l1	increased or absent threshold for auditory brainstem response	30kHz-evoked ABR Threshold	http://www.mousephenotype.org/data/charts?accession=MGI:1340024&allele_accession_id=MGI:5548445&zygosity=homozygote&parameter_stable_id=IMPC_ABR_012_001&pipeline_stable_id=HMGU_001&phenotyping_center=HMGU
Aldh1l1	decreased threshold for auditory brainstem response	30kHz-evoked ABR Threshold	http://www.mousephenotype.org/data/charts?accession=MGI:1340024&allele_accession_id=MGI:5548445&zygosity=homozygote&parameter_stable_id=IMPC_ABR_012_001&pipeline_stable_id=HMGU_001&phenotyping_center=HMGU
Aldoc	increased or absent threshold for auditory brainstem response	6kHz-evoked ABR Threshold	http://www.mousephenotype.org/data/charts?accession=MGI:101863&allele_accession_id=MGI:5548322&zygosity=homozygote&parameter_stable_id=IMPC_ABR_004_001&pipeline_stable_id=UCD_001&phenotyping_center=UC Davis
Ankrd11	increased or absent threshold for auditory brainstem response	6kHz-evoked ABR Threshold	http://www.mousephenotype.org/data/charts?accession=MGI:1924337&allele_accession_id=MGI:5548681&zygosity=heterozygote&parameter_stable_id=IMPC_ABR_004_001&pipeline_stable_id=ICS_001&phenotyping_center=ICS
Ankrd11	increased or absent threshold for auditory brainstem response	12kHz-evoked ABR Threshold	http://www.mousephenotype.org/data/charts?accession=MGI:1924337&allele_accession_id=MGI:5548681&zygosity=heterozygote&parameter_stable_id=IMPC_ABR_006_001&pipeline_stable_id=ICS_001&phenotyping_center=ICS
Ankrd11	increased or absent threshold for auditory brainstem response	18kHz-evoked ABR Threshold	http://www.mousephenotype.org/data/charts?accession=MGI:1924337&allele_accession_id=MGI:5548681&zygosity=heterozygote&parameter_stable_id=IMPC_ABR_008_001&pipeline_stable_id=ICS_001&phenotyping_center=ICS
Ankrd11	increased or absent threshold for auditory brainstem response	24kHz-evoked ABR Threshold	http://www.mousephenotype.org/data/charts?accession=MGI:1924337&allele_accession_id=MGI:5548681&zygosity=heterozygote&parameter_stable_id=IMPC_ABR_010_001&pipeline_stable_id=ICS_001&phenotyping_center=ICS
Ap4e1	increased or absent threshold for auditory brainstem response	30kHz-evoked ABR Threshold	http://www.mousephenotype.org/data/charts?accession=MGI:1336993&allele_accession_id=MGI:5548434&zygosity=homozygote&parameter_stable_id=IMPC_ABR_012_001&pipeline_stable_id=IMPC_001&phenotyping_center=KMPC
Arhgap29	increased or absent threshold for auditory brainstem response	12kHz-evoked ABR Threshold	http://www.mousephenotype.org/data/charts?accession=MGI:2443818&allele_accession_id=MGI:5749747&zygosity=heterozygote&parameter_stable_id=IMPC_ABR_006_001&pipeline_stable_id=JAX_001&phenotyping_center=JAX
Aspn	increased or absent threshold for auditory brainstem response	6kHz-evoked ABR Threshold	http://www.mousephenotype.org/data/charts?accession=MGI:1913945&allele_accession_id=MGI:5548526&zygosity=homozygote&parameter_stable_id=IMPC_ABR_004_001&pipeline_stable_id=HMGU_001&phenotyping_center=HMGU
Atad2b	increased or absent threshold for auditory brainstem response	24kHz-evoked ABR Threshold	http://www.mousephenotype.org/data/charts?accession=MGI:2444798&allele_accession_id=MGI:5548831&zygosity=homozygote&parameter_stable_id=IMPC_ABR_010_001&pipeline_stable_id=ICS_001&phenotyping_center=ICS
Atad2b	increased or absent threshold for auditory brainstem response	30kHz-evoked ABR Threshold	http://www.mousephenotype.org/data/charts?accession=MGI:2444798&allele_accession_id=MGI:5548831&zygosity=homozygote&parameter_stable_id=IMPC_ABR_012_001&pipeline_stable_id=ICS_001&phenotyping_center=ICS
Atg4b	increased or absent threshold for auditory brainstem response	Click-evoked ABR threshold	http://www.mousephenotype.org/data/charts?accession=MGI:1913865&allele_accession_id=NULL-EFD1E7E16&zygosity=homozygote&parameter_stable_id=IMPC_ABR_002_001&pipeline_stable_id=IMPC_001&phenotyping_center=MARC
Atg4b	increased or absent threshold for auditory brainstem response	24kHz-evoked ABR Threshold	http://www.mousephenotype.org/data/charts?accession=MGI:1913865&allele_accession_id=NULL-EFD1E7E16&zygosity=homozygote&parameter_stable_id=IMPC_ABR_010_001&pipeline_stable_id=IMPC_001&phenotyping_center=MARC
Atp8b1	increased or absent threshold for auditory brainstem response	18kHz-evoked ABR Threshold	http://www.mousephenotype.org/data/charts?accession=MGI:1859665&allele_accession_id=MGI:6156424&zygosity=homozygote&parameter_stable_id=IMPC_ABR_008_001&pipeline_stable_id=TCP_001&phenotyping_center=TCP
Atp8b1	increased or absent threshold for auditory brainstem response	6kHz-evoked ABR Threshold	http://www.mousephenotype.org/data/charts?accession=MGI:1859665&allele_accession_id=MGI:6156424&zygosity=homozygote&parameter_stable_id=IMPC_ABR_004_001&pipeline_stable_id=TCP_001&phenotyping_center=TCP
Atp8b1	increased or absent threshold for auditory brainstem response	Click-evoked ABR threshold	http://www.mousephenotype.org/data/charts?accession=MGI:1859665&allele_accession_id=MGI:6156424&zygosity=homozygote&parameter_stable_id=IMPC_ABR_002_001&pipeline_stable_id=TCP_001&phenotyping_center=TCP
Atp8b1	increased or absent threshold for auditory brainstem response	30kHz-evoked ABR Threshold	http://www.mousephenotype.org/data/charts?accession=MGI:1859665&allele_accession_id=MGI:6156424&zygosity=homozygote&parameter_stable_id=IMPC_ABR_012_001&pipeline_stable_id=TCP_001&phenotyping_center=TCP
Atp8b1	increased or absent threshold for auditory brainstem response	12kHz-evoked ABR Threshold	http://www.mousephenotype.org/data/charts?accession=MGI:1859665&allele_accession_id=MGI:6156424&zygosity=homozygote&parameter_stable_id=IMPC_ABR_006_001&pipeline_stable_id=TCP_001&phenotyping_center=TCP
Avpi1	decreased threshold for auditory brainstem response	Click-evoked ABR threshold	http://www.mousephenotype.org/data/charts?accession=MGI:1916784&allele_accession_id=MGI:5548586&zygosity=homozygote&parameter_stable_id=IMPC_ABR_002_001&pipeline_stable_id=HMGU_001&phenotyping_center=HMGU
Avpi1	decreased threshold for auditory brainstem response	12kHz-evoked ABR Threshold	http://www.mousephenotype.org/data/charts?accession=MGI:1916784&allele_accession_id=MGI:5548586&zygosity=homozygote&parameter_stable_id=IMPC_ABR_006_001&pipeline_stable_id=HMGU_001&phenotyping_center=HMGU
Baiap2l2	increased or absent threshold for auditory brainstem response	6kHz-evoked ABR Threshold	http://www.mousephenotype.org/data/charts?accession=MGI:2652819&allele_accession_id=MGI:5548844&zygosity=homozygote&parameter_stable_id=IMPC_ABR_004_001&pipeline_stable_id=ICS_001&phenotyping_center=ICS
Baiap2l2	increased or absent threshold for auditory brainstem response	12kHz-evoked ABR Threshold	http://www.mousephenotype.org/data/charts?accession=MGI:2652819&allele_accession_id=MGI:5548844&zygosity=homozygote&parameter_stable_id=IMPC_ABR_006_001&pipeline_stable_id=ICS_001&phenotyping_center=ICS
Baiap2l2	increased or absent threshold for auditory brainstem response	18kHz-evoked ABR Threshold	http://www.mousephenotype.org/data/charts?accession=MGI:2652819&allele_accession_id=MGI:5548844&zygosity=homozygote&parameter_stable_id=IMPC_ABR_008_001&pipeline_stable_id=ICS_001&phenotyping_center=ICS
Baiap2l2	increased or absent threshold for auditory brainstem response	24kHz-evoked ABR Threshold	http://www.mousephenotype.org/data/charts?accession=MGI:2652819&allele_accession_id=MGI:5548844&zygosity=homozygote&parameter_stable_id=IMPC_ABR_010_001&pipeline_stable_id=ICS_001&phenotyping_center=ICS
Bap1	increased or absent threshold for auditory brainstem response	24kHz-evoked ABR Threshold	http://www.mousephenotype.org/data/charts?accession=MGI:1206586&allele_accession_id=NULL-E8DDC3FFF&zygosity=heterozygote&parameter_stable_id=IMPC_ABR_010_001&pipeline_stable_id=IMPC_001&phenotyping_center=MARC
Blvrb	increased or absent threshold for auditory brainstem response	30kHz-evoked ABR Threshold	http://www.mousephenotype.org/data/charts?accession=MGI:2385271&allele_accession_id=MGI:4419545&zygosity=homozygote&parameter_stable_id=IMPC_ABR_012_001&pipeline_stable_id=IMPC_001&phenotyping_center=MARC
Blvrb	increased or absent threshold for auditory brainstem response	24kHz-evoked ABR Threshold	http://www.mousephenotype.org/data/charts?accession=MGI:2385271&allele_accession_id=MGI:4419545&zygosity=homozygote&parameter_stable_id=IMPC_ABR_010_001&pipeline_stable_id=IMPC_001&phenotyping_center=MARC
Bod1	increased or absent threshold for auditory brainstem response	24kHz-evoked ABR Threshold	http://www.mousephenotype.org/data/charts?accession=MGI:1916806&allele_accession_id=MGI:5694175&zygosity=heterozygote&parameter_stable_id=IMPC_ABR_010_001&pipeline_stable_id=IMPC_001&phenotyping_center=MARC
Brd2	increased or absent threshold for auditory brainstem response	30kHz-evoked ABR Threshold	http://www.mousephenotype.org/data/charts?accession=MGI:99495&allele_accession_id=MGI:6147548&zygosity=heterozygote&parameter_stable_id=IMPC_ABR_012_001&pipeline_stable_id=MGP_001&phenotyping_center=WTSI
Bzw1	decreased threshold for auditory brainstem response	30kHz-evoked ABR Threshold	http://www.mousephenotype.org/data/charts?accession=MGI:1914132&allele_accession_id=MGI:5763137&zygosity=homozygote&parameter_stable_id=IMPC_ABR_012_001&pipeline_stable_id=JAX_001&phenotyping_center=JAX
Ccdc88c	increased or absent threshold for auditory brainstem response	18kHz-evoked ABR Threshold	http://www.mousephenotype.org/data/charts?accession=MGI:1915589&allele_accession_id=NULL-387FB49D6&zygosity=homozygote&parameter_stable_id=IMPC_ABR_008_001&pipeline_stable_id=UCD_001&phenotyping_center=UC Davis
Ccdc88c	increased or absent threshold for auditory brainstem response	30kHz-evoked ABR Threshold	http://www.mousephenotype.org/data/charts?accession=MGI:1915589&allele_accession_id=NULL-387FB49D6&zygosity=homozygote&parameter_stable_id=IMPC_ABR_012_001&pipeline_stable_id=UCD_001&phenotyping_center=UC Davis
Ccdc88c	increased or absent threshold for auditory brainstem response	24kHz-evoked ABR Threshold	http://www.mousephenotype.org/data/charts?accession=MGI:1915589&allele_accession_id=NULL-387FB49D6&zygosity=homozygote&parameter_stable_id=IMPC_ABR_010_001&pipeline_stable_id=UCD_001&phenotyping_center=UC Davis
Ccdc92	increased or absent threshold for auditory brainstem response	24kHz-evoked ABR Threshold	http://www.mousephenotype.org/data/charts?accession=MGI:106485&allele_accession_id=MGI:5692564&zygosity=homozygote&parameter_stable_id=IMPC_ABR_010_001&pipeline_stable_id=UCD_001&phenotyping_center=UC Davis
Ccn5	increased or absent threshold for auditory brainstem response	6kHz-evoked ABR Threshold	http://www.mousephenotype.org/data/charts?accession=MGI:1328326&allele_accession_id=MGI:5548427&zygosity=homozygote&parameter_stable_id=IMPC_ABR_004_001&pipeline_stable_id=UCD_001&phenotyping_center=UC Davis
Cep250	increased or absent threshold for auditory brainstem response	24kHz-evoked ABR Threshold	http://www.mousephenotype.org/data/charts?accession=MGI:108084&allele_accession_id=MGI:4431949&zygosity=homozygote&parameter_stable_id=IMPC_ABR_010_001&pipeline_stable_id=MGP_001&phenotyping_center=WTSI
Cep250	increased or absent threshold for auditory brainstem response	30kHz-evoked ABR Threshold	http://www.mousephenotype.org/data/charts?accession=MGI:108084&allele_accession_id=MGI:4431949&zygosity=homozygote&parameter_stable_id=IMPC_ABR_012_001&pipeline_stable_id=MGP_001&phenotyping_center=WTSI
Ces1f	increased or absent threshold for auditory brainstem response	30kHz-evoked ABR Threshold	http://www.mousephenotype.org/data/charts?accession=MGI:2142687&allele_accession_id=MGI:5752553&zygosity=homozygote&parameter_stable_id=IMPC_ABR_012_001&pipeline_stable_id=IMPC_001&phenotyping_center=MARC
Ckb	increased or absent threshold for auditory brainstem response	24kHz-evoked ABR Threshold	http://www.mousephenotype.org/data/charts?accession=MGI:88407&allele_accession_id=MGI:5692879&zygosity=homozygote&parameter_stable_id=IMPC_ABR_010_001&pipeline_stable_id=UCD_001&phenotyping_center=UC Davis
Clec3b	increased or absent threshold for auditory brainstem response	18kHz-evoked ABR Threshold	http://www.mousephenotype.org/data/charts?accession=MGI:104540&allele_accession_id=MGI:5646134&zygosity=homozygote&parameter_stable_id=IMPC_ABR_008_001&pipeline_stable_id=JAX_001&phenotyping_center=JAX
Clrn1	increased or absent threshold for auditory brainstem response	12kHz-evoked ABR Threshold	http://www.mousephenotype.org/data/charts?accession=MGI:2388124&allele_accession_id=MGI:5582439&zygosity=homozygote&parameter_stable_id=IMPC_ABR_006_001&pipeline_stable_id=UCD_001&phenotyping_center=UC Davis
Clrn1	increased or absent threshold for auditory brainstem response	6kHz-evoked ABR Threshold	http://www.mousephenotype.org/data/charts?accession=MGI:2388124&allele_accession_id=MGI:5582439&zygosity=homozygote&parameter_stable_id=IMPC_ABR_004_001&pipeline_stable_id=UCD_001&phenotyping_center=UC Davis
Clrn1	increased or absent threshold for auditory brainstem response	18kHz-evoked ABR Threshold	http://www.mousephenotype.org/data/charts?accession=MGI:2388124&allele_accession_id=MGI:5582439&zygosity=homozygote&parameter_stable_id=IMPC_ABR_008_001&pipeline_stable_id=UCD_001&phenotyping_center=UC Davis
Clrn1	increased or absent threshold for auditory brainstem response	30kHz-evoked ABR Threshold	http://www.mousephenotype.org/data/charts?accession=MGI:2388124&allele_accession_id=MGI:5582439&zygosity=homozygote&parameter_stable_id=IMPC_ABR_012_001&pipeline_stable_id=UCD_001&phenotyping_center=UC Davis
Clrn1	increased or absent threshold for auditory brainstem response	24kHz-evoked ABR Threshold	http://www.mousephenotype.org/data/charts?accession=MGI:2388124&allele_accession_id=MGI:5582439&zygosity=homozygote&parameter_stable_id=IMPC_ABR_010_001&pipeline_stable_id=UCD_001&phenotyping_center=UC Davis
Col9a2	increased or absent threshold for auditory brainstem response	6kHz-evoked ABR Threshold	http://www.mousephenotype.org/data/charts?accession=MGI:88466&allele_accession_id=MGI:5692882&zygosity=homozygote&parameter_stable_id=IMPC_ABR_004_001&pipeline_stable_id=HRWL_001&phenotyping_center=MRC Harwell
Col9a2	increased or absent threshold for auditory brainstem response	18kHz-evoked ABR Threshold	http://www.mousephenotype.org/data/charts?accession=MGI:88466&allele_accession_id=MGI:5692882&zygosity=homozygote&parameter_stable_id=IMPC_ABR_008_001&pipeline_stable_id=HRWL_001&phenotyping_center=MRC Harwell
Col9a2	increased or absent threshold for auditory brainstem response	24kHz-evoked ABR Threshold	http://www.mousephenotype.org/data/charts?accession=MGI:88466&allele_accession_id=MGI:5692882&zygosity=homozygote&parameter_stable_id=IMPC_ABR_010_001&pipeline_stable_id=HRWL_001&phenotyping_center=MRC Harwell
Col9a2	increased or absent threshold for auditory brainstem response	30kHz-evoked ABR Threshold	http://www.mousephenotype.org/data/charts?accession=MGI:88466&allele_accession_id=MGI:5692882&zygosity=homozygote&parameter_stable_id=IMPC_ABR_012_001&pipeline_stable_id=HRWL_001&phenotyping_center=MRC Harwell
Cox4i1	increased or absent threshold for auditory brainstem response	30kHz-evoked ABR Threshold	http://www.mousephenotype.org/data/charts?accession=MGI:88473&allele_accession_id=MGI:5548923&zygosity=heterozygote&parameter_stable_id=IMPC_ABR_012_001&pipeline_stable_id=TCP_001&phenotyping_center=TCP
Csnk1g2	increased or absent threshold for auditory brainstem response	Click-evoked ABR threshold	http://www.mousephenotype.org/data/charts?accession=MGI:1920014&allele_accession_id=MGI:5613652&zygosity=homozygote&parameter_stable_id=IMPC_ABR_002_001&pipeline_stable_id=HMGU_001&phenotyping_center=HMGU
Cyp17a1	increased or absent threshold for auditory brainstem response	24kHz-evoked ABR Threshold	http://www.mousephenotype.org/data/charts?accession=MGI:88586&allele_accession_id=MGI:5605834&zygosity=homozygote&parameter_stable_id=IMPC_ABR_010_001&pipeline_stable_id=IMPC_001&phenotyping_center=MARC
D6Wsu163e	increased or absent threshold for auditory brainstem response	30kHz-evoked ABR Threshold	http://www.mousephenotype.org/data/charts?accession=MGI:107893&allele_accession_id=MGI:5636910&zygosity=homozygote&parameter_stable_id=IMPC_ABR_012_001&pipeline_stable_id=MGP_001&phenotyping_center=WTSI
Dctd	increased or absent threshold for auditory brainstem response	24kHz-evoked ABR Threshold	http://www.mousephenotype.org/data/charts?accession=MGI:2444529&allele_accession_id=NULL-9499973A4&zygosity=homozygote&parameter_stable_id=IMPC_ABR_010_001&pipeline_stable_id=IMPC_001&phenotyping_center=MARC
Defb43	increased or absent threshold for auditory brainstem response	24kHz-evoked ABR Threshold	http://www.mousephenotype.org/data/charts?accession=MGI:3647180&allele_accession_id=MGI:5692868&zygosity=homozygote&parameter_stable_id=IMPC_ABR_010_001&pipeline_stable_id=IMPC_001&phenotyping_center=MARC
Dlec1	decreased threshold for auditory brainstem response	Click-evoked ABR threshold	http://www.mousephenotype.org/data/charts?accession=MGI:2443671&allele_accession_id=MGI:5548818&zygosity=homozygote&parameter_stable_id=IMPC_ABR_002_001&pipeline_stable_id=HMGU_001&phenotyping_center=HMGU
Dnajc14	increased or absent threshold for auditory brainstem response	18kHz-evoked ABR Threshold	http://www.mousephenotype.org/data/charts?accession=MGI:1921580&allele_accession_id=MGI:5471951&zygosity=homozygote&parameter_stable_id=IMPC_ABR_008_001&pipeline_stable_id=JAX_001&phenotyping_center=JAX
Dnajc17	decreased threshold for auditory brainstem response	30kHz-evoked ABR Threshold	http://www.mousephenotype.org/data/charts?accession=MGI:1916658&allele_accession_id=MGI:5548585&zygosity=heterozygote&parameter_stable_id=IMPC_ABR_012_001&pipeline_stable_id=HMGU_001&phenotyping_center=HMGU
Dnase1	increased or absent threshold for auditory brainstem response	30kHz-evoked ABR Threshold	http://www.mousephenotype.org/data/charts?accession=MGI:103157&allele_accession_id=MGI:5620311&zygosity=homozygote&parameter_stable_id=IMPC_ABR_012_001&pipeline_stable_id=UCD_001&phenotyping_center=UC Davis
Dnmbp	increased or absent threshold for auditory brainstem response	30kHz-evoked ABR Threshold	http://www.mousephenotype.org/data/charts?accession=MGI:1917352&allele_accession_id=MGI:6152467&zygosity=homozygote&parameter_stable_id=IMPC_ABR_012_001&pipeline_stable_id=UCD_001&phenotyping_center=UC Davis
Dok7	decreased threshold for auditory brainstem response	6kHz-evoked ABR Threshold	http://www.mousephenotype.org/data/charts?accession=MGI:3584043&allele_accession_id=MGI:5582445&zygosity=heterozygote&parameter_stable_id=IMPC_ABR_004_001&pipeline_stable_id=UCD_001&phenotyping_center=UC Davis
Duoxa2	increased or absent threshold for auditory brainstem response	6kHz-evoked ABR Threshold	http://www.mousephenotype.org/data/charts?accession=MGI:1914061&allele_accession_id=MGI:5637016&zygosity=homozygote&parameter_stable_id=IMPC_ABR_004_001&pipeline_stable_id=MGP_001&phenotyping_center=WTSI
Duoxa2	increased or absent threshold for auditory brainstem response	12kHz-evoked ABR Threshold	http://www.mousephenotype.org/data/charts?accession=MGI:1914061&allele_accession_id=MGI:5637016&zygosity=homozygote&parameter_stable_id=IMPC_ABR_006_001&pipeline_stable_id=MGP_001&phenotyping_center=WTSI
Duoxa2	increased or absent threshold for auditory brainstem response	18kHz-evoked ABR Threshold	http://www.mousephenotype.org/data/charts?accession=MGI:1914061&allele_accession_id=MGI:5637016&zygosity=homozygote&parameter_stable_id=IMPC_ABR_008_001&pipeline_stable_id=MGP_001&phenotyping_center=WTSI
Duoxa2	increased or absent threshold for auditory brainstem response	24kHz-evoked ABR Threshold	http://www.mousephenotype.org/data/charts?accession=MGI:1914061&allele_accession_id=MGI:5637016&zygosity=homozygote&parameter_stable_id=IMPC_ABR_010_001&pipeline_stable_id=MGP_001&phenotyping_center=WTSI
Duoxa2	increased or absent threshold for auditory brainstem response	30kHz-evoked ABR Threshold	http://www.mousephenotype.org/data/charts?accession=MGI:1914061&allele_accession_id=MGI:5637016&zygosity=homozygote&parameter_stable_id=IMPC_ABR_012_001&pipeline_stable_id=MGP_001&phenotyping_center=WTSI
Duoxa2	increased or absent threshold for auditory brainstem response	Click-evoked ABR threshold	http://www.mousephenotype.org/data/charts?accession=MGI:1914061&allele_accession_id=MGI:5637016&zygosity=homozygote&parameter_stable_id=IMPC_ABR_002_001&pipeline_stable_id=MGP_001&phenotyping_center=WTSI
Dyrk1b	increased or absent threshold for auditory brainstem response	30kHz-evoked ABR Threshold	http://www.mousephenotype.org/data/charts?accession=MGI:1330302&allele_accession_id=MGI:5548430&zygosity=heterozygote&parameter_stable_id=IMPC_ABR_012_001&pipeline_stable_id=ICS_001&phenotyping_center=ICS
Elmo3	increased or absent threshold for auditory brainstem response	6kHz-evoked ABR Threshold	http://www.mousephenotype.org/data/charts?accession=MGI:2679007&allele_accession_id=MGI:5548855&zygosity=homozygote&parameter_stable_id=IMPC_ABR_004_001&pipeline_stable_id=UCD_001&phenotyping_center=UC Davis
Elmod1	increased or absent threshold for auditory brainstem response	6kHz-evoked ABR Threshold	http://www.mousephenotype.org/data/charts?accession=MGI:3583900&allele_accession_id=MGI:5548895&zygosity=homozygote&parameter_stable_id=IMPC_ABR_004_001&pipeline_stable_id=HRWL_001&phenotyping_center=MRC Harwell
Elmod1	increased or absent threshold for auditory brainstem response	18kHz-evoked ABR Threshold	http://www.mousephenotype.org/data/charts?accession=MGI:3583900&allele_accession_id=MGI:5548895&zygosity=homozygote&parameter_stable_id=IMPC_ABR_008_001&pipeline_stable_id=HRWL_001&phenotyping_center=MRC Harwell
Elmod1	increased or absent threshold for auditory brainstem response	24kHz-evoked ABR Threshold	http://www.mousephenotype.org/data/charts?accession=MGI:3583900&allele_accession_id=MGI:5548895&zygosity=homozygote&parameter_stable_id=IMPC_ABR_010_001&pipeline_stable_id=HRWL_001&phenotyping_center=MRC Harwell
Elmod1	increased or absent threshold for auditory brainstem response	12kHz-evoked ABR Threshold	http://www.mousephenotype.org/data/charts?accession=MGI:3583900&allele_accession_id=MGI:5548895&zygosity=homozygote&parameter_stable_id=IMPC_ABR_006_001&pipeline_stable_id=HRWL_001&phenotyping_center=MRC Harwell
Elmod1	increased or absent threshold for auditory brainstem response	30kHz-evoked ABR Threshold	http://www.mousephenotype.org/data/charts?accession=MGI:3583900&allele_accession_id=MGI:5548895&zygosity=homozygote&parameter_stable_id=IMPC_ABR_012_001&pipeline_stable_id=HRWL_001&phenotyping_center=MRC Harwell
Epn3	increased or absent threshold for auditory brainstem response	30kHz-evoked ABR Threshold	http://www.mousephenotype.org/data/charts?accession=MGI:1919139&allele_accession_id=MGI:5548611&zygosity=homozygote&parameter_stable_id=IMPC_ABR_012_001&pipeline_stable_id=UCD_001&phenotyping_center=UC Davis
Erlec1	increased or absent threshold for auditory brainstem response	30kHz-evoked ABR Threshold	http://www.mousephenotype.org/data/charts?accession=MGI:1914003&allele_accession_id=MGI:6152474&zygosity=homozygote&parameter_stable_id=IMPC_ABR_012_001&pipeline_stable_id=UCD_001&phenotyping_center=UC Davis
Espnl	increased or absent threshold for auditory brainstem response	18kHz-evoked ABR Threshold	http://www.mousephenotype.org/data/charts?accession=MGI:2685402&allele_accession_id=MGI:5554914&zygosity=homozygote&parameter_stable_id=IMPC_ABR_008_001&pipeline_stable_id=JAX_001&phenotyping_center=JAX
Espnl	increased or absent threshold for auditory brainstem response	12kHz-evoked ABR Threshold	http://www.mousephenotype.org/data/charts?accession=MGI:2685402&allele_accession_id=MGI:5554914&zygosity=homozygote&parameter_stable_id=IMPC_ABR_006_001&pipeline_stable_id=JAX_001&phenotyping_center=JAX
Espnl	increased or absent threshold for auditory brainstem response	30kHz-evoked ABR Threshold	http://www.mousephenotype.org/data/charts?accession=MGI:2685402&allele_accession_id=MGI:5554914&zygosity=homozygote&parameter_stable_id=IMPC_ABR_012_001&pipeline_stable_id=JAX_001&phenotyping_center=JAX
Eya4	increased or absent threshold for auditory brainstem response	24kHz-evoked ABR Threshold	http://www.mousephenotype.org/data/charts?accession=MGI:1337104&allele_accession_id=MGI:5548437&zygosity=heterozygote&parameter_stable_id=IMPC_ABR_010_001&pipeline_stable_id=TCP_001&phenotyping_center=TCP
Eya4	increased or absent threshold for auditory brainstem response	Click-evoked ABR threshold	http://www.mousephenotype.org/data/charts?accession=MGI:1337104&allele_accession_id=MGI:5548437&zygosity=heterozygote&parameter_stable_id=IMPC_ABR_002_001&pipeline_stable_id=TCP_001&phenotyping_center=TCP
Fads3	increased or absent threshold for auditory brainstem response	6kHz-evoked ABR Threshold	http://www.mousephenotype.org/data/charts?accession=MGI:1928740&allele_accession_id=MGI:5692754&zygosity=homozygote&parameter_stable_id=IMPC_ABR_004_001&pipeline_stable_id=MGP_001&phenotyping_center=WTSI
Fads3	increased or absent threshold for auditory brainstem response	30kHz-evoked ABR Threshold	http://www.mousephenotype.org/data/charts?accession=MGI:1928740&allele_accession_id=MGI:5692754&zygosity=homozygote&parameter_stable_id=IMPC_ABR_012_001&pipeline_stable_id=MGP_001&phenotyping_center=WTSI
Fads3	increased or absent threshold for auditory brainstem response	24kHz-evoked ABR Threshold	http://www.mousephenotype.org/data/charts?accession=MGI:1928740&allele_accession_id=MGI:5692754&zygosity=homozygote&parameter_stable_id=IMPC_ABR_010_001&pipeline_stable_id=MGP_001&phenotyping_center=WTSI
Fam166b	increased or absent threshold for auditory brainstem response	24kHz-evoked ABR Threshold	http://www.mousephenotype.org/data/charts?accession=MGI:2445194&allele_accession_id=MGI:4841123&zygosity=homozygote&parameter_stable_id=IMPC_ABR_010_001&pipeline_stable_id=IMPC_001&phenotyping_center=MARC
Fam53b	decreased threshold for auditory brainstem response	30kHz-evoked ABR Threshold	http://www.mousephenotype.org/data/charts?accession=MGI:1925188&allele_accession_id=MGI:5548690&zygosity=homozygote&parameter_stable_id=IMPC_ABR_012_001&pipeline_stable_id=HMGU_001&phenotyping_center=HMGU
Fam53b	decreased threshold for auditory brainstem response	24kHz-evoked ABR Threshold	http://www.mousephenotype.org/data/charts?accession=MGI:1925188&allele_accession_id=MGI:5548690&zygosity=homozygote&parameter_stable_id=IMPC_ABR_010_001&pipeline_stable_id=HMGU_001&phenotyping_center=HMGU
Fbxl15	increased or absent threshold for auditory brainstem response	24kHz-evoked ABR Threshold	http://www.mousephenotype.org/data/charts?accession=MGI:1915681&allele_accession_id=NULL-607F6283A&zygosity=homozygote&parameter_stable_id=IMPC_ABR_010_001&pipeline_stable_id=IMPC_001&phenotyping_center=MARC
Fbxl8	increased or absent threshold for auditory brainstem response	24kHz-evoked ABR Threshold	http://www.mousephenotype.org/data/charts?accession=MGI:1354697&allele_accession_id=NULL-ADD8D875E&zygosity=homozygote&parameter_stable_id=IMPC_ABR_010_001&pipeline_stable_id=IMPC_001&phenotyping_center=MARC
Fbxo24	increased or absent threshold for auditory brainstem response	24kHz-evoked ABR Threshold	http://www.mousephenotype.org/data/charts?accession=MGI:1918426&allele_accession_id=NULL-F6CB8197C&zygosity=homozygote&parameter_stable_id=IMPC_ABR_010_001&pipeline_stable_id=IMPC_001&phenotyping_center=MARC
Fbxo33	increased or absent threshold for auditory brainstem response	30kHz-evoked ABR Threshold	http://www.mousephenotype.org/data/charts?accession=MGI:1917861&allele_accession_id=MGI:5548601&zygosity=homozygote&parameter_stable_id=IMPC_ABR_012_001&pipeline_stable_id=MGP_001&phenotyping_center=WTSI
Foxo3	increased or absent threshold for auditory brainstem response	18kHz-evoked ABR Threshold	http://www.mousephenotype.org/data/charts?accession=MGI:1890081&allele_accession_id=MGI:5471395&zygosity=homozygote&parameter_stable_id=IMPC_ABR_008_001&pipeline_stable_id=JAX_001&phenotyping_center=JAX
Frs2	decreased threshold for auditory brainstem response	30kHz-evoked ABR Threshold	http://www.mousephenotype.org/data/charts?accession=MGI:1100860&allele_accession_id=MGI:5548401&zygosity=heterozygote&parameter_stable_id=IMPC_ABR_012_001&pipeline_stable_id=HRWL_001&phenotyping_center=MRC Harwell
Gata2	increased or absent threshold for auditory brainstem response	12kHz-evoked ABR Threshold	http://www.mousephenotype.org/data/charts?accession=MGI:95662&allele_accession_id=MGI:5605839&zygosity=heterozygote&parameter_stable_id=IMPC_ABR_006_001&pipeline_stable_id=UCD_001&phenotyping_center=UC Davis
Gata2	increased or absent threshold for auditory brainstem response	6kHz-evoked ABR Threshold	http://www.mousephenotype.org/data/charts?accession=MGI:95662&allele_accession_id=MGI:5605839&zygosity=heterozygote&parameter_stable_id=IMPC_ABR_004_001&pipeline_stable_id=UCD_001&phenotyping_center=UC Davis
Gata2	increased or absent threshold for auditory brainstem response	18kHz-evoked ABR Threshold	http://www.mousephenotype.org/data/charts?accession=MGI:95662&allele_accession_id=MGI:5605839&zygosity=heterozygote&parameter_stable_id=IMPC_ABR_008_001&pipeline_stable_id=UCD_001&phenotyping_center=UC Davis
Gga1	increased or absent threshold for auditory brainstem response	18kHz-evoked ABR Threshold	http://www.mousephenotype.org/data/charts?accession=MGI:2146207&allele_accession_id=MGI:5695948&zygosity=homozygote&parameter_stable_id=IMPC_ABR_008_001&pipeline_stable_id=UCD_001&phenotyping_center=UC Davis
Gipc3	increased or absent threshold for auditory brainstem response	18kHz-evoked ABR Threshold	http://www.mousephenotype.org/data/charts?accession=MGI:2387006&allele_accession_id=MGI:5446012&zygosity=homozygote&parameter_stable_id=IMPC_ABR_008_001&pipeline_stable_id=JAX_001&phenotyping_center=JAX
Gipc3	increased or absent threshold for auditory brainstem response	12kHz-evoked ABR Threshold	http://www.mousephenotype.org/data/charts?accession=MGI:2387006&allele_accession_id=MGI:5446012&zygosity=homozygote&parameter_stable_id=IMPC_ABR_006_001&pipeline_stable_id=JAX_001&phenotyping_center=JAX
Gipc3	increased or absent threshold for auditory brainstem response	24kHz-evoked ABR Threshold	http://www.mousephenotype.org/data/charts?accession=MGI:2387006&allele_accession_id=MGI:5446012&zygosity=homozygote&parameter_stable_id=IMPC_ABR_010_001&pipeline_stable_id=JAX_001&phenotyping_center=JAX
Gipc3	increased or absent threshold for auditory brainstem response	6kHz-evoked ABR Threshold	http://www.mousephenotype.org/data/charts?accession=MGI:2387006&allele_accession_id=MGI:5446012&zygosity=homozygote&parameter_stable_id=IMPC_ABR_004_001&pipeline_stable_id=JAX_001&phenotyping_center=JAX
Gipc3	increased or absent threshold for auditory brainstem response	30kHz-evoked ABR Threshold	http://www.mousephenotype.org/data/charts?accession=MGI:2387006&allele_accession_id=MGI:5446012&zygosity=homozygote&parameter_stable_id=IMPC_ABR_012_001&pipeline_stable_id=JAX_001&phenotyping_center=JAX
Gjb3	increased or absent threshold for auditory brainstem response	18kHz-evoked ABR Threshold	http://www.mousephenotype.org/data/charts?accession=MGI:95721&allele_accession_id=MGI:5692890&zygosity=heterozygote&parameter_stable_id=IMPC_ABR_008_001&pipeline_stable_id=UCD_001&phenotyping_center=UC Davis
Gm12258	decreased threshold for auditory brainstem response	30kHz-evoked ABR Threshold	http://www.mousephenotype.org/data/charts?accession=MGI:3651534&allele_accession_id=MGI:5548909&zygosity=homozygote&parameter_stable_id=IMPC_ABR_012_001&pipeline_stable_id=ICS_001&phenotyping_center=ICS
Golph3	increased or absent threshold for auditory brainstem response	Click-evoked ABR threshold	http://www.mousephenotype.org/data/charts?accession=MGI:1913879&allele_accession_id=MGI:6156473&zygosity=homozygote&parameter_stable_id=IMPC_ABR_002_001&pipeline_stable_id=TCP_001&phenotyping_center=TCP
Gorasp1	increased or absent threshold for auditory brainstem response	30kHz-evoked ABR Threshold	http://www.mousephenotype.org/data/charts?accession=MGI:1921748&allele_accession_id=MGI:5766756&zygosity=heterozygote&parameter_stable_id=IMPC_ABR_012_001&pipeline_stable_id=ICS_001&phenotyping_center=ICS
Gorasp1	increased or absent threshold for auditory brainstem response	18kHz-evoked ABR Threshold	http://www.mousephenotype.org/data/charts?accession=MGI:1921748&allele_accession_id=MGI:5766756&zygosity=heterozygote&parameter_stable_id=IMPC_ABR_008_001&pipeline_stable_id=ICS_001&phenotyping_center=ICS
Gpr152	increased or absent threshold for auditory brainstem response	30kHz-evoked ABR Threshold	http://www.mousephenotype.org/data/charts?accession=MGI:2685519&allele_accession_id=MGI:5548871&zygosity=homozygote&parameter_stable_id=IMPC_ABR_012_001&pipeline_stable_id=MGP_001&phenotyping_center=WTSI
Gtpbp2	increased or absent threshold for auditory brainstem response	6kHz-evoked ABR Threshold	http://www.mousephenotype.org/data/charts?accession=MGI:1860138&allele_accession_id=MGI:5548500&zygosity=homozygote&parameter_stable_id=IMPC_ABR_004_001&pipeline_stable_id=TCP_001&phenotyping_center=TCP
Gtpbp2	increased or absent threshold for auditory brainstem response	24kHz-evoked ABR Threshold	http://www.mousephenotype.org/data/charts?accession=MGI:1860138&allele_accession_id=MGI:5548500&zygosity=homozygote&parameter_stable_id=IMPC_ABR_010_001&pipeline_stable_id=TCP_001&phenotyping_center=TCP
Hilpda	decreased threshold for auditory brainstem response	12kHz-evoked ABR Threshold	http://www.mousephenotype.org/data/charts?accession=MGI:1916823&allele_accession_id=NULL-CB87580A9&zygosity=homozygote&parameter_stable_id=IMPC_ABR_006_001&pipeline_stable_id=IMPC_001&phenotyping_center=MARC
Hipk3	increased or absent threshold for auditory brainstem response	Click-evoked ABR threshold	http://www.mousephenotype.org/data/charts?accession=MGI:1314882&allele_accession_id=MGI:5588270&zygosity=homozygote&parameter_stable_id=IMPC_ABR_002_001&pipeline_stable_id=HMGU_001&phenotyping_center=HMGU
Hipk3	increased or absent threshold for auditory brainstem response	12kHz-evoked ABR Threshold	http://www.mousephenotype.org/data/charts?accession=MGI:1314882&allele_accession_id=MGI:5588270&zygosity=homozygote&parameter_stable_id=IMPC_ABR_006_001&pipeline_stable_id=HMGU_001&phenotyping_center=HMGU
Hmx2	decreased threshold for auditory brainstem response	6kHz-evoked ABR Threshold	http://www.mousephenotype.org/data/charts?accession=MGI:107159&allele_accession_id=MGI:5708171&zygosity=homozygote&parameter_stable_id=IMPC_ABR_004_001&pipeline_stable_id=UCD_001&phenotyping_center=UC Davis
Hoxa2	increased or absent threshold for auditory brainstem response	Click-evoked ABR threshold	http://www.mousephenotype.org/data/charts?accession=MGI:96174&allele_accession_id=MGI:5613670&zygosity=heterozygote&parameter_stable_id=IMPC_ABR_002_001&pipeline_stable_id=HMGU_001&phenotyping_center=HMGU
Hsd17b4	increased or absent threshold for auditory brainstem response	Click-evoked ABR threshold	http://www.mousephenotype.org/data/charts?accession=MGI:105089&allele_accession_id=MGI:6156445&zygosity=homozygote&parameter_stable_id=IMPC_ABR_002_001&pipeline_stable_id=TCP_001&phenotyping_center=TCP
Igsf9b	increased or absent threshold for auditory brainstem response	12kHz-evoked ABR Threshold	http://www.mousephenotype.org/data/charts?accession=MGI:2685354&allele_accession_id=MGI:6107617&zygosity=homozygote&parameter_stable_id=IMPC_ABR_006_001&pipeline_stable_id=JAX_001&phenotyping_center=JAX
Igsf9b	increased or absent threshold for auditory brainstem response	6kHz-evoked ABR Threshold	http://www.mousephenotype.org/data/charts?accession=MGI:2685354&allele_accession_id=MGI:6107617&zygosity=homozygote&parameter_stable_id=IMPC_ABR_004_001&pipeline_stable_id=JAX_001&phenotyping_center=JAX
Ikzf5	increased or absent threshold for auditory brainstem response	30kHz-evoked ABR Threshold	http://www.mousephenotype.org/data/charts?accession=MGI:1914393&allele_accession_id=MGI:4419517&zygosity=homozygote&parameter_stable_id=IMPC_ABR_012_001&pipeline_stable_id=IMPC_001&phenotyping_center=RBRC
Il10ra	increased or absent threshold for auditory brainstem response	30kHz-evoked ABR Threshold	http://www.mousephenotype.org/data/charts?accession=MGI:96538&allele_accession_id=MGI:5766765&zygosity=homozygote&parameter_stable_id=IMPC_ABR_012_001&pipeline_stable_id=ICS_001&phenotyping_center=ICS
Il1r2	increased or absent threshold for auditory brainstem response	6kHz-evoked ABR Threshold	http://www.mousephenotype.org/data/charts?accession=MGI:96546&allele_accession_id=MGI:5695974&zygosity=homozygote&parameter_stable_id=IMPC_ABR_004_001&pipeline_stable_id=UCD_001&phenotyping_center=UC Davis
Ildr1	increased or absent threshold for auditory brainstem response	6kHz-evoked ABR Threshold	http://www.mousephenotype.org/data/charts?accession=MGI:2146574&allele_accession_id=MGI:4419159&zygosity=homozygote&parameter_stable_id=IMPC_ABR_004_001&pipeline_stable_id=MGP_001&phenotyping_center=WTSI
Ildr1	increased or absent threshold for auditory brainstem response	12kHz-evoked ABR Threshold	http://www.mousephenotype.org/data/charts?accession=MGI:2146574&allele_accession_id=MGI:4419159&zygosity=homozygote&parameter_stable_id=IMPC_ABR_006_001&pipeline_stable_id=MGP_001&phenotyping_center=WTSI
Ildr1	increased or absent threshold for auditory brainstem response	24kHz-evoked ABR Threshold	http://www.mousephenotype.org/data/charts?accession=MGI:2146574&allele_accession_id=MGI:4419159&zygosity=homozygote&parameter_stable_id=IMPC_ABR_010_001&pipeline_stable_id=MGP_001&phenotyping_center=WTSI
Ildr1	increased or absent threshold for auditory brainstem response	30kHz-evoked ABR Threshold	http://www.mousephenotype.org/data/charts?accession=MGI:2146574&allele_accession_id=MGI:4419159&zygosity=homozygote&parameter_stable_id=IMPC_ABR_012_001&pipeline_stable_id=MGP_001&phenotyping_center=WTSI
Ildr1	increased or absent threshold for auditory brainstem response	Click-evoked ABR threshold	http://www.mousephenotype.org/data/charts?accession=MGI:2146574&allele_accession_id=MGI:4419159&zygosity=homozygote&parameter_stable_id=IMPC_ABR_002_001&pipeline_stable_id=MGP_001&phenotyping_center=WTSI
Ildr1	increased or absent threshold for auditory brainstem response	18kHz-evoked ABR Threshold	http://www.mousephenotype.org/data/charts?accession=MGI:2146574&allele_accession_id=MGI:4419159&zygosity=homozygote&parameter_stable_id=IMPC_ABR_008_001&pipeline_stable_id=MGP_001&phenotyping_center=WTSI
Iqgap2	decreased threshold for auditory brainstem response	30kHz-evoked ABR Threshold	http://www.mousephenotype.org/data/charts?accession=MGI:2449975&allele_accession_id=MGI:5558039&zygosity=homozygote&parameter_stable_id=IMPC_ABR_012_001&pipeline_stable_id=JAX_001&phenotyping_center=JAX
Iqgap2	decreased threshold for auditory brainstem response	24kHz-evoked ABR Threshold	http://www.mousephenotype.org/data/charts?accession=MGI:2449975&allele_accession_id=MGI:5558039&zygosity=homozygote&parameter_stable_id=IMPC_ABR_010_001&pipeline_stable_id=JAX_001&phenotyping_center=JAX
Klc2	increased or absent threshold for auditory brainstem response	Click-evoked ABR threshold	http://www.mousephenotype.org/data/charts?accession=MGI:107953&allele_accession_id=MGI:4434042&zygosity=homozygote&parameter_stable_id=IMPC_ABR_002_001&pipeline_stable_id=MGP_001&phenotyping_center=WTSI
Klc2	increased or absent threshold for auditory brainstem response	6kHz-evoked ABR Threshold	http://www.mousephenotype.org/data/charts?accession=MGI:107953&allele_accession_id=MGI:4434042&zygosity=homozygote&parameter_stable_id=IMPC_ABR_004_001&pipeline_stable_id=MGP_001&phenotyping_center=WTSI
Klc2	increased or absent threshold for auditory brainstem response	12kHz-evoked ABR Threshold	http://www.mousephenotype.org/data/charts?accession=MGI:107953&allele_accession_id=MGI:4434042&zygosity=homozygote&parameter_stable_id=IMPC_ABR_006_001&pipeline_stable_id=MGP_001&phenotyping_center=WTSI
Klc2	increased or absent threshold for auditory brainstem response	30kHz-evoked ABR Threshold	http://www.mousephenotype.org/data/charts?accession=MGI:107953&allele_accession_id=MGI:4434042&zygosity=homozygote&parameter_stable_id=IMPC_ABR_012_001&pipeline_stable_id=MGP_001&phenotyping_center=WTSI
Klc2	increased or absent threshold for auditory brainstem response	24kHz-evoked ABR Threshold	http://www.mousephenotype.org/data/charts?accession=MGI:107953&allele_accession_id=MGI:4434042&zygosity=homozygote&parameter_stable_id=IMPC_ABR_010_001&pipeline_stable_id=MGP_001&phenotyping_center=WTSI
Klc2	increased or absent threshold for auditory brainstem response	18kHz-evoked ABR Threshold	http://www.mousephenotype.org/data/charts?accession=MGI:107953&allele_accession_id=MGI:4434042&zygosity=homozygote&parameter_stable_id=IMPC_ABR_008_001&pipeline_stable_id=MGP_001&phenotyping_center=WTSI
Klhl18	increased or absent threshold for auditory brainstem response	12kHz-evoked ABR Threshold	http://www.mousephenotype.org/data/charts?accession=MGI:2143315&allele_accession_id=MGI:4362936&zygosity=homozygote&parameter_stable_id=IMPC_ABR_006_001&pipeline_stable_id=MGP_001&phenotyping_center=WTSI
Klhl18	increased or absent threshold for auditory brainstem response	6kHz-evoked ABR Threshold	http://www.mousephenotype.org/data/charts?accession=MGI:2143315&allele_accession_id=MGI:4362936&zygosity=homozygote&parameter_stable_id=IMPC_ABR_004_001&pipeline_stable_id=MGP_001&phenotyping_center=WTSI
Klhl18	increased or absent threshold for auditory brainstem response	24kHz-evoked ABR Threshold	http://www.mousephenotype.org/data/charts?accession=MGI:2143315&allele_accession_id=MGI:4362936&zygosity=homozygote&parameter_stable_id=IMPC_ABR_010_001&pipeline_stable_id=MGP_001&phenotyping_center=WTSI
Klhl18	increased or absent threshold for auditory brainstem response	Click-evoked ABR threshold	http://www.mousephenotype.org/data/charts?accession=MGI:2143315&allele_accession_id=MGI:4362936&zygosity=homozygote&parameter_stable_id=IMPC_ABR_002_001&pipeline_stable_id=MGP_001&phenotyping_center=WTSI
Klk5	increased or absent threshold for auditory brainstem response	12kHz-evoked ABR Threshold	http://www.mousephenotype.org/data/charts?accession=MGI:1915918&allele_accession_id=MGI:5604101&zygosity=homozygote&parameter_stable_id=IMPC_ABR_006_001&pipeline_stable_id=HMGU_001&phenotyping_center=HMGU
Lsm14a	increased or absent threshold for auditory brainstem response	30kHz-evoked ABR Threshold	http://www.mousephenotype.org/data/charts?accession=MGI:1914320&allele_accession_id=MGI:5548532&zygosity=heterozygote&parameter_stable_id=IMPC_ABR_012_001&pipeline_stable_id=IMPC_001&phenotyping_center=MARC
Macrod2	decreased threshold for auditory brainstem response	18kHz-evoked ABR Threshold	http://www.mousephenotype.org/data/charts?accession=MGI:1920149&allele_accession_id=MGI:5445674&zygosity=heterozygote&parameter_stable_id=IMPC_ABR_008_001&pipeline_stable_id=JAX_001&phenotyping_center=JAX
Marveld2	increased or absent threshold for auditory brainstem response	6kHz-evoked ABR Threshold	http://www.mousephenotype.org/data/charts?accession=MGI:2446166&allele_accession_id=MGI:5637157&zygosity=homozygote&parameter_stable_id=IMPC_ABR_004_001&pipeline_stable_id=HRWL_001&phenotyping_center=MRC Harwell
Marveld2	increased or absent threshold for auditory brainstem response	18kHz-evoked ABR Threshold	http://www.mousephenotype.org/data/charts?accession=MGI:2446166&allele_accession_id=MGI:5637157&zygosity=homozygote&parameter_stable_id=IMPC_ABR_008_001&pipeline_stable_id=HRWL_001&phenotyping_center=MRC Harwell
Marveld2	increased or absent threshold for auditory brainstem response	24kHz-evoked ABR Threshold	http://www.mousephenotype.org/data/charts?accession=MGI:2446166&allele_accession_id=MGI:5637157&zygosity=homozygote&parameter_stable_id=IMPC_ABR_010_001&pipeline_stable_id=HRWL_001&phenotyping_center=MRC Harwell
Marveld2	increased or absent threshold for auditory brainstem response	12kHz-evoked ABR Threshold	http://www.mousephenotype.org/data/charts?accession=MGI:2446166&allele_accession_id=MGI:5637157&zygosity=homozygote&parameter_stable_id=IMPC_ABR_006_001&pipeline_stable_id=HRWL_001&phenotyping_center=MRC Harwell
Marveld2	increased or absent threshold for auditory brainstem response	30kHz-evoked ABR Threshold	http://www.mousephenotype.org/data/charts?accession=MGI:2446166&allele_accession_id=MGI:5637157&zygosity=homozygote&parameter_stable_id=IMPC_ABR_012_001&pipeline_stable_id=HRWL_001&phenotyping_center=MRC Harwell
Mcidas	increased or absent threshold for auditory brainstem response	Click-evoked ABR threshold	http://www.mousephenotype.org/data/charts?accession=MGI:3648807&allele_accession_id=MGI:6157333&zygosity=homozygote&parameter_stable_id=IMPC_ABR_002_001&pipeline_stable_id=TCP_001&phenotyping_center=TCP
Mcidas	increased or absent threshold for auditory brainstem response	12kHz-evoked ABR Threshold	http://www.mousephenotype.org/data/charts?accession=MGI:3648807&allele_accession_id=MGI:6157333&zygosity=homozygote&parameter_stable_id=IMPC_ABR_006_001&pipeline_stable_id=TCP_001&phenotyping_center=TCP
Mcidas	increased or absent threshold for auditory brainstem response	18kHz-evoked ABR Threshold	http://www.mousephenotype.org/data/charts?accession=MGI:3648807&allele_accession_id=MGI:6157333&zygosity=homozygote&parameter_stable_id=IMPC_ABR_008_001&pipeline_stable_id=TCP_001&phenotyping_center=TCP
Mcidas	increased or absent threshold for auditory brainstem response	24kHz-evoked ABR Threshold	http://www.mousephenotype.org/data/charts?accession=MGI:3648807&allele_accession_id=MGI:6157333&zygosity=homozygote&parameter_stable_id=IMPC_ABR_010_001&pipeline_stable_id=TCP_001&phenotyping_center=TCP
Mcidas	increased or absent threshold for auditory brainstem response	6kHz-evoked ABR Threshold	http://www.mousephenotype.org/data/charts?accession=MGI:3648807&allele_accession_id=MGI:6157333&zygosity=homozygote&parameter_stable_id=IMPC_ABR_004_001&pipeline_stable_id=TCP_001&phenotyping_center=TCP
Med10	decreased threshold for auditory brainstem response	30kHz-evoked ABR Threshold	http://www.mousephenotype.org/data/charts?accession=MGI:106331&allele_accession_id=MGI:5766989&zygosity=heterozygote&parameter_stable_id=IMPC_ABR_012_001&pipeline_stable_id=JAX_001&phenotyping_center=JAX
Med25	increased or absent threshold for auditory brainstem response	30kHz-evoked ABR Threshold	http://www.mousephenotype.org/data/charts?accession=MGI:1922863&allele_accession_id=MGI:5615649&zygosity=heterozygote&parameter_stable_id=IMPC_ABR_012_001&pipeline_stable_id=ICS_001&phenotyping_center=ICS
Med28	increased or absent threshold for auditory brainstem response	6kHz-evoked ABR Threshold	http://www.mousephenotype.org/data/charts?accession=MGI:1914249&allele_accession_id=MGI:5548528&zygosity=heterozygote&parameter_stable_id=IMPC_ABR_004_001&pipeline_stable_id=UCD_001&phenotyping_center=UC Davis
Mfsd4b4	increased or absent threshold for auditory brainstem response	12kHz-evoked ABR Threshold	http://www.mousephenotype.org/data/charts?accession=MGI:3035041&allele_accession_id=MGI:6104251&zygosity=homozygote&parameter_stable_id=IMPC_ABR_006_001&pipeline_stable_id=JAX_001&phenotyping_center=JAX
Mgrn1	increased or absent threshold for auditory brainstem response	18kHz-evoked ABR Threshold	http://www.mousephenotype.org/data/charts?accession=MGI:2447670&allele_accession_id=MGI:6156581&zygosity=homozygote&parameter_stable_id=IMPC_ABR_008_001&pipeline_stable_id=TCP_001&phenotyping_center=TCP
Mgrn1	increased or absent threshold for auditory brainstem response	Click-evoked ABR threshold	http://www.mousephenotype.org/data/charts?accession=MGI:2447670&allele_accession_id=MGI:6156581&zygosity=homozygote&parameter_stable_id=IMPC_ABR_002_001&pipeline_stable_id=TCP_001&phenotyping_center=TCP
Minar2	increased or absent threshold for auditory brainstem response	6kHz-evoked ABR Threshold	http://www.mousephenotype.org/data/charts?accession=MGI:2442934&allele_accession_id=MGI:5637144&zygosity=homozygote&parameter_stable_id=IMPC_ABR_004_001&pipeline_stable_id=MGP_001&phenotyping_center=WTSI
Minar2	increased or absent threshold for auditory brainstem response	12kHz-evoked ABR Threshold	http://www.mousephenotype.org/data/charts?accession=MGI:2442934&allele_accession_id=MGI:5637144&zygosity=homozygote&parameter_stable_id=IMPC_ABR_006_001&pipeline_stable_id=MGP_001&phenotyping_center=WTSI
Minar2	increased or absent threshold for auditory brainstem response	18kHz-evoked ABR Threshold	http://www.mousephenotype.org/data/charts?accession=MGI:2442934&allele_accession_id=MGI:5637144&zygosity=homozygote&parameter_stable_id=IMPC_ABR_008_001&pipeline_stable_id=MGP_001&phenotyping_center=WTSI
Minar2	increased or absent threshold for auditory brainstem response	24kHz-evoked ABR Threshold	http://www.mousephenotype.org/data/charts?accession=MGI:2442934&allele_accession_id=MGI:5637144&zygosity=homozygote&parameter_stable_id=IMPC_ABR_010_001&pipeline_stable_id=MGP_001&phenotyping_center=WTSI
Minar2	increased or absent threshold for auditory brainstem response	30kHz-evoked ABR Threshold	http://www.mousephenotype.org/data/charts?accession=MGI:2442934&allele_accession_id=MGI:5637144&zygosity=homozygote&parameter_stable_id=IMPC_ABR_012_001&pipeline_stable_id=MGP_001&phenotyping_center=WTSI
Minar2	increased or absent threshold for auditory brainstem response	Click-evoked ABR threshold	http://www.mousephenotype.org/data/charts?accession=MGI:2442934&allele_accession_id=MGI:5637144&zygosity=homozygote&parameter_stable_id=IMPC_ABR_002_001&pipeline_stable_id=MGP_001&phenotyping_center=WTSI
Mkrn2	increased or absent threshold for auditory brainstem response	30kHz-evoked ABR Threshold	http://www.mousephenotype.org/data/charts?accession=MGI:1914277&allele_accession_id=MGI:5548531&zygosity=homozygote&parameter_stable_id=IMPC_ABR_012_001&pipeline_stable_id=MGP_001&phenotyping_center=WTSI
Mpdz	increased or absent threshold for auditory brainstem response	18kHz-evoked ABR Threshold	http://www.mousephenotype.org/data/charts?accession=MGI:1343489&allele_accession_id=MGI:5571597&zygosity=homozygote&parameter_stable_id=IMPC_ABR_008_001&pipeline_stable_id=JAX_001&phenotyping_center=JAX
Mpdz	increased or absent threshold for auditory brainstem response	12kHz-evoked ABR Threshold	http://www.mousephenotype.org/data/charts?accession=MGI:1343489&allele_accession_id=MGI:5571597&zygosity=homozygote&parameter_stable_id=IMPC_ABR_006_001&pipeline_stable_id=JAX_001&phenotyping_center=JAX
Myh1	increased or absent threshold for auditory brainstem response	24kHz-evoked ABR Threshold	http://www.mousephenotype.org/data/charts?accession=MGI:1339711&allele_accession_id=MGI:5617788&zygosity=homozygote&parameter_stable_id=IMPC_ABR_010_001&pipeline_stable_id=JAX_001&phenotyping_center=JAX
Myo10	increased or absent threshold for auditory brainstem response	Click-evoked ABR threshold	http://www.mousephenotype.org/data/charts?accession=MGI:107716&allele_accession_id=MGI:4362966&zygosity=homozygote&parameter_stable_id=IMPC_ABR_002_001&pipeline_stable_id=MGP_001&phenotyping_center=WTSI
Myo7a	increased or absent threshold for auditory brainstem response	6kHz-evoked ABR Threshold	http://www.mousephenotype.org/data/charts?accession=MGI:104510&allele_accession_id=MGI:4431921&zygosity=homozygote&parameter_stable_id=IMPC_ABR_004_001&pipeline_stable_id=MGP_001&phenotyping_center=WTSI
Myo7a	increased or absent threshold for auditory brainstem response	12kHz-evoked ABR Threshold	http://www.mousephenotype.org/data/charts?accession=MGI:104510&allele_accession_id=MGI:4431921&zygosity=homozygote&parameter_stable_id=IMPC_ABR_006_001&pipeline_stable_id=MGP_001&phenotyping_center=WTSI
Myo7a	increased or absent threshold for auditory brainstem response	24kHz-evoked ABR Threshold	http://www.mousephenotype.org/data/charts?accession=MGI:104510&allele_accession_id=MGI:4431921&zygosity=homozygote&parameter_stable_id=IMPC_ABR_010_001&pipeline_stable_id=MGP_001&phenotyping_center=WTSI
Myo7a	increased or absent threshold for auditory brainstem response	30kHz-evoked ABR Threshold	http://www.mousephenotype.org/data/charts?accession=MGI:104510&allele_accession_id=MGI:4431921&zygosity=homozygote&parameter_stable_id=IMPC_ABR_012_001&pipeline_stable_id=MGP_001&phenotyping_center=WTSI
Myo7a	increased or absent threshold for auditory brainstem response	Click-evoked ABR threshold	http://www.mousephenotype.org/data/charts?accession=MGI:104510&allele_accession_id=MGI:4431921&zygosity=homozygote&parameter_stable_id=IMPC_ABR_002_001&pipeline_stable_id=MGP_001&phenotyping_center=WTSI
Myo7a	increased or absent threshold for auditory brainstem response	18kHz-evoked ABR Threshold	http://www.mousephenotype.org/data/charts?accession=MGI:104510&allele_accession_id=MGI:4431921&zygosity=homozygote&parameter_stable_id=IMPC_ABR_008_001&pipeline_stable_id=MGP_001&phenotyping_center=WTSI
Nacc1	increased or absent threshold for auditory brainstem response	Click-evoked ABR threshold	http://www.mousephenotype.org/data/charts?accession=MGI:1914080&allele_accession_id=NULL-09CA04696&zygosity=homozygote&parameter_stable_id=IMPC_ABR_002_001&pipeline_stable_id=HMGU_001&phenotyping_center=HMGU
Nedd4l	increased or absent threshold for auditory brainstem response	6kHz-evoked ABR Threshold	http://www.mousephenotype.org/data/charts?accession=MGI:1933754&allele_accession_id=MGI:5637104&zygosity=homozygote&parameter_stable_id=IMPC_ABR_004_001&pipeline_stable_id=HRWL_001&phenotyping_center=MRC Harwell
Nedd4l	increased or absent threshold for auditory brainstem response	18kHz-evoked ABR Threshold	http://www.mousephenotype.org/data/charts?accession=MGI:1933754&allele_accession_id=MGI:5637104&zygosity=homozygote&parameter_stable_id=IMPC_ABR_008_001&pipeline_stable_id=HRWL_001&phenotyping_center=MRC Harwell
Nedd4l	increased or absent threshold for auditory brainstem response	24kHz-evoked ABR Threshold	http://www.mousephenotype.org/data/charts?accession=MGI:1933754&allele_accession_id=MGI:5637104&zygosity=homozygote&parameter_stable_id=IMPC_ABR_010_001&pipeline_stable_id=HRWL_001&phenotyping_center=MRC Harwell
Nedd4l	increased or absent threshold for auditory brainstem response	12kHz-evoked ABR Threshold	http://www.mousephenotype.org/data/charts?accession=MGI:1933754&allele_accession_id=MGI:5637104&zygosity=homozygote&parameter_stable_id=IMPC_ABR_006_001&pipeline_stable_id=HRWL_001&phenotyping_center=MRC Harwell
Nedd4l	increased or absent threshold for auditory brainstem response	30kHz-evoked ABR Threshold	http://www.mousephenotype.org/data/charts?accession=MGI:1933754&allele_accession_id=MGI:5637104&zygosity=homozygote&parameter_stable_id=IMPC_ABR_012_001&pipeline_stable_id=HRWL_001&phenotyping_center=MRC Harwell
Nedd4l	increased or absent threshold for auditory brainstem response	Click-evoked ABR threshold	http://www.mousephenotype.org/data/charts?accession=MGI:1933754&allele_accession_id=MGI:5637104&zygosity=homozygote&parameter_stable_id=IMPC_ABR_002_001&pipeline_stable_id=HRWL_001&phenotyping_center=MRC Harwell
Nemp1	increased or absent threshold for auditory brainstem response	30kHz-evoked ABR Threshold	http://www.mousephenotype.org/data/charts?accession=MGI:2446113&allele_accession_id=MGI:5897390&zygosity=homozygote&parameter_stable_id=IMPC_ABR_012_001&pipeline_stable_id=UCD_001&phenotyping_center=UC Davis
Nin	increased or absent threshold for auditory brainstem response	12kHz-evoked ABR Threshold	http://www.mousephenotype.org/data/charts?accession=MGI:105108&allele_accession_id=MGI:5606341&zygosity=homozygote&parameter_stable_id=IMPC_ABR_006_001&pipeline_stable_id=IMPC_001&phenotyping_center=RBRC
Nin	increased or absent threshold for auditory brainstem response	18kHz-evoked ABR Threshold	http://www.mousephenotype.org/data/charts?accession=MGI:105108&allele_accession_id=MGI:5606341&zygosity=homozygote&parameter_stable_id=IMPC_ABR_008_001&pipeline_stable_id=IMPC_001&phenotyping_center=RBRC
Nin	increased or absent threshold for auditory brainstem response	24kHz-evoked ABR Threshold	http://www.mousephenotype.org/data/charts?accession=MGI:105108&allele_accession_id=MGI:5606341&zygosity=homozygote&parameter_stable_id=IMPC_ABR_010_001&pipeline_stable_id=IMPC_001&phenotyping_center=RBRC
Nin	increased or absent threshold for auditory brainstem response	30kHz-evoked ABR Threshold	http://www.mousephenotype.org/data/charts?accession=MGI:105108&allele_accession_id=MGI:5606341&zygosity=homozygote&parameter_stable_id=IMPC_ABR_012_001&pipeline_stable_id=IMPC_001&phenotyping_center=RBRC
Nin	increased or absent threshold for auditory brainstem response	Click-evoked ABR threshold	http://www.mousephenotype.org/data/charts?accession=MGI:105108&allele_accession_id=MGI:5606341&zygosity=homozygote&parameter_stable_id=IMPC_ABR_002_001&pipeline_stable_id=IMPC_001&phenotyping_center=RBRC
Nptn	increased or absent threshold for auditory brainstem response	6kHz-evoked ABR Threshold	http://www.mousephenotype.org/data/charts?accession=MGI:108077&allele_accession_id=MGI:5548382&zygosity=homozygote&parameter_stable_id=IMPC_ABR_004_001&pipeline_stable_id=HRWL_001&phenotyping_center=MRC Harwell
Nptn	increased or absent threshold for auditory brainstem response	18kHz-evoked ABR Threshold	http://www.mousephenotype.org/data/charts?accession=MGI:108077&allele_accession_id=MGI:5548382&zygosity=homozygote&parameter_stable_id=IMPC_ABR_008_001&pipeline_stable_id=HRWL_001&phenotyping_center=MRC Harwell
Nptn	increased or absent threshold for auditory brainstem response	24kHz-evoked ABR Threshold	http://www.mousephenotype.org/data/charts?accession=MGI:108077&allele_accession_id=MGI:5548382&zygosity=homozygote&parameter_stable_id=IMPC_ABR_010_001&pipeline_stable_id=HRWL_001&phenotyping_center=MRC Harwell
Nptn	increased or absent threshold for auditory brainstem response	12kHz-evoked ABR Threshold	http://www.mousephenotype.org/data/charts?accession=MGI:108077&allele_accession_id=MGI:5548382&zygosity=homozygote&parameter_stable_id=IMPC_ABR_006_001&pipeline_stable_id=HRWL_001&phenotyping_center=MRC Harwell
Nptn	increased or absent threshold for auditory brainstem response	30kHz-evoked ABR Threshold	http://www.mousephenotype.org/data/charts?accession=MGI:108077&allele_accession_id=MGI:5548382&zygosity=homozygote&parameter_stable_id=IMPC_ABR_012_001&pipeline_stable_id=HRWL_001&phenotyping_center=MRC Harwell
Nt5dc2	increased or absent threshold for auditory brainstem response	18kHz-evoked ABR Threshold	http://www.mousephenotype.org/data/charts?accession=MGI:1917271&allele_accession_id=MGI:5902345&zygosity=homozygote&parameter_stable_id=IMPC_ABR_008_001&pipeline_stable_id=JAX_001&phenotyping_center=JAX
Nxn	increased or absent threshold for auditory brainstem response	24kHz-evoked ABR Threshold	http://www.mousephenotype.org/data/charts?accession=MGI:109331&allele_accession_id=MGI:5548389&zygosity=heterozygote&parameter_stable_id=IMPC_ABR_010_001&pipeline_stable_id=TCP_001&phenotyping_center=TCP
Ocm	increased or absent threshold for auditory brainstem response	6kHz-evoked ABR Threshold	http://www.mousephenotype.org/data/charts?accession=MGI:97401&allele_accession_id=MGI:4432497&zygosity=homozygote&parameter_stable_id=IMPC_ABR_004_001&pipeline_stable_id=MGP_001&phenotyping_center=WTSI
Ocm	increased or absent threshold for auditory brainstem response	12kHz-evoked ABR Threshold	http://www.mousephenotype.org/data/charts?accession=MGI:97401&allele_accession_id=MGI:4432497&zygosity=homozygote&parameter_stable_id=IMPC_ABR_006_001&pipeline_stable_id=MGP_001&phenotyping_center=WTSI
Ocm	increased or absent threshold for auditory brainstem response	24kHz-evoked ABR Threshold	http://www.mousephenotype.org/data/charts?accession=MGI:97401&allele_accession_id=MGI:4432497&zygosity=homozygote&parameter_stable_id=IMPC_ABR_010_001&pipeline_stable_id=MGP_001&phenotyping_center=WTSI
Ocm	increased or absent threshold for auditory brainstem response	30kHz-evoked ABR Threshold	http://www.mousephenotype.org/data/charts?accession=MGI:97401&allele_accession_id=MGI:4432497&zygosity=homozygote&parameter_stable_id=IMPC_ABR_012_001&pipeline_stable_id=MGP_001&phenotyping_center=WTSI
Ocm	increased or absent threshold for auditory brainstem response	Click-evoked ABR threshold	http://www.mousephenotype.org/data/charts?accession=MGI:97401&allele_accession_id=MGI:4432497&zygosity=homozygote&parameter_stable_id=IMPC_ABR_002_001&pipeline_stable_id=MGP_001&phenotyping_center=WTSI
Ocm	increased or absent threshold for auditory brainstem response	18kHz-evoked ABR Threshold	http://www.mousephenotype.org/data/charts?accession=MGI:97401&allele_accession_id=MGI:4432497&zygosity=homozygote&parameter_stable_id=IMPC_ABR_008_001&pipeline_stable_id=MGP_001&phenotyping_center=WTSI
Odf3l2	increased or absent threshold for auditory brainstem response	12kHz-evoked ABR Threshold	http://www.mousephenotype.org/data/charts?accession=MGI:2686003&allele_accession_id=MGI:5548879&zygosity=heterozygote&parameter_stable_id=IMPC_ABR_006_001&pipeline_stable_id=UCD_001&phenotyping_center=UC Davis
Odf3l2	increased or absent threshold for auditory brainstem response	30kHz-evoked ABR Threshold	http://www.mousephenotype.org/data/charts?accession=MGI:2686003&allele_accession_id=MGI:5548879&zygosity=homozygote&parameter_stable_id=IMPC_ABR_012_001&pipeline_stable_id=UCD_001&phenotyping_center=UC Davis
Otoa	increased or absent threshold for auditory brainstem response	6kHz-evoked ABR Threshold	http://www.mousephenotype.org/data/charts?accession=MGI:2149209&allele_accession_id=MGI:5548754&zygosity=homozygote&parameter_stable_id=IMPC_ABR_004_001&pipeline_stable_id=UCD_001&phenotyping_center=UC Davis
Otoa	increased or absent threshold for auditory brainstem response	12kHz-evoked ABR Threshold	http://www.mousephenotype.org/data/charts?accession=MGI:2149209&allele_accession_id=MGI:5548754&zygosity=homozygote&parameter_stable_id=IMPC_ABR_006_001&pipeline_stable_id=UCD_001&phenotyping_center=UC Davis
Otoa	increased or absent threshold for auditory brainstem response	18kHz-evoked ABR Threshold	http://www.mousephenotype.org/data/charts?accession=MGI:2149209&allele_accession_id=MGI:5548754&zygosity=homozygote&parameter_stable_id=IMPC_ABR_008_001&pipeline_stable_id=UCD_001&phenotyping_center=UC Davis
Otoa	increased or absent threshold for auditory brainstem response	24kHz-evoked ABR Threshold	http://www.mousephenotype.org/data/charts?accession=MGI:2149209&allele_accession_id=MGI:5548754&zygosity=homozygote&parameter_stable_id=IMPC_ABR_010_001&pipeline_stable_id=UCD_001&phenotyping_center=UC Davis
Otoa	increased or absent threshold for auditory brainstem response	30kHz-evoked ABR Threshold	http://www.mousephenotype.org/data/charts?accession=MGI:2149209&allele_accession_id=MGI:5548754&zygosity=homozygote&parameter_stable_id=IMPC_ABR_012_001&pipeline_stable_id=UCD_001&phenotyping_center=UC Davis
Otud3	increased or absent threshold for auditory brainstem response	30kHz-evoked ABR Threshold	http://www.mousephenotype.org/data/charts?accession=MGI:1920412&allele_accession_id=NULL-B804249AA&zygosity=homozygote&parameter_stable_id=IMPC_ABR_012_001&pipeline_stable_id=IMPC_001&phenotyping_center=MARC
Oxsm	increased or absent threshold for auditory brainstem response	24kHz-evoked ABR Threshold	http://www.mousephenotype.org/data/charts?accession=MGI:1918397&allele_accession_id=NULL-04207DA18&zygosity=heterozygote&parameter_stable_id=IMPC_ABR_010_001&pipeline_stable_id=IMPC_001&phenotyping_center=MARC
Pax5	decreased threshold for auditory brainstem response	30kHz-evoked ABR Threshold	http://www.mousephenotype.org/data/charts?accession=MGI:97489&allele_accession_id=MGI:5692910&zygosity=heterozygote&parameter_stable_id=IMPC_ABR_012_001&pipeline_stable_id=HMGU_001&phenotyping_center=HMGU
Phf3	increased or absent threshold for auditory brainstem response	24kHz-evoked ABR Threshold	http://www.mousephenotype.org/data/charts?accession=MGI:2446126&allele_accession_id=NULL-DA103E082&zygosity=homozygote&parameter_stable_id=IMPC_ABR_010_001&pipeline_stable_id=IMPC_001&phenotyping_center=MARC
Phf6	increased or absent threshold for auditory brainstem response	24kHz-evoked ABR Threshold	http://www.mousephenotype.org/data/charts?accession=MGI:1918248&allele_accession_id=MGI:5548606&zygosity=heterozygote&parameter_stable_id=IMPC_ABR_010_001&pipeline_stable_id=ICS_001&phenotyping_center=ICS
Plcb4	increased or absent threshold for auditory brainstem response	30kHz-evoked ABR Threshold	http://www.mousephenotype.org/data/charts?accession=MGI:107464&allele_accession_id=MGI:5630063&zygosity=homozygote&parameter_stable_id=IMPC_ABR_012_001&pipeline_stable_id=UCD_001&phenotyping_center=UC Davis
Plin4	increased or absent threshold for auditory brainstem response	18kHz-evoked ABR Threshold	http://www.mousephenotype.org/data/charts?accession=MGI:1929709&allele_accession_id=NULL-CC94F9BED&zygosity=homozygote&parameter_stable_id=IMPC_ABR_008_001&pipeline_stable_id=UCD_001&phenotyping_center=UC Davis
Plod3	decreased threshold for auditory brainstem response	6kHz-evoked ABR Threshold	http://www.mousephenotype.org/data/charts?accession=MGI:1347008&allele_accession_id=MGI:5629312&zygosity=heterozygote&parameter_stable_id=IMPC_ABR_004_001&pipeline_stable_id=UCD_001&phenotyping_center=UC Davis
Ppfia3	increased or absent threshold for auditory brainstem response	18kHz-evoked ABR Threshold	http://www.mousephenotype.org/data/charts?accession=MGI:1924037&allele_accession_id=MGI:6109981&zygosity=homozygote&parameter_stable_id=IMPC_ABR_008_001&pipeline_stable_id=JAX_001&phenotyping_center=JAX
Ppp1r14a	increased or absent threshold for auditory brainstem response	24kHz-evoked ABR Threshold	http://www.mousephenotype.org/data/charts?accession=MGI:1931139&allele_accession_id=NULL-2A2EBB876&zygosity=homozygote&parameter_stable_id=IMPC_ABR_010_001&pipeline_stable_id=IMPC_001&phenotyping_center=MARC
Ppp2r5e	increased or absent threshold for auditory brainstem response	30kHz-evoked ABR Threshold	http://www.mousephenotype.org/data/charts?accession=MGI:1349473&allele_accession_id=NULL-7FCCB5F1D&zygosity=homozygote&parameter_stable_id=IMPC_ABR_012_001&pipeline_stable_id=IMPC_001&phenotyping_center=MARC
Ppp2r5e	increased or absent threshold for auditory brainstem response	24kHz-evoked ABR Threshold	http://www.mousephenotype.org/data/charts?accession=MGI:1349473&allele_accession_id=NULL-7FCCB5F1D&zygosity=homozygote&parameter_stable_id=IMPC_ABR_010_001&pipeline_stable_id=IMPC_001&phenotyping_center=MARC
Ppp6c	decreased threshold for auditory brainstem response	6kHz-evoked ABR Threshold	http://www.mousephenotype.org/data/charts?accession=MGI:1915107&allele_accession_id=MGI:5548551&zygosity=heterozygote&parameter_stable_id=IMPC_ABR_004_001&pipeline_stable_id=ICS_001&phenotyping_center=ICS
Prdm5	increased or absent threshold for auditory brainstem response	Click-evoked ABR threshold	http://www.mousephenotype.org/data/charts?accession=MGI:1918029&allele_accession_id=MGI:6156485&zygosity=homozygote&parameter_stable_id=IMPC_ABR_002_001&pipeline_stable_id=TCP_001&phenotyping_center=TCP
Prdm5	increased or absent threshold for auditory brainstem response	18kHz-evoked ABR Threshold	http://www.mousephenotype.org/data/charts?accession=MGI:1918029&allele_accession_id=MGI:6156485&zygosity=homozygote&parameter_stable_id=IMPC_ABR_008_001&pipeline_stable_id=TCP_001&phenotyping_center=TCP
Prmt9	increased or absent threshold for auditory brainstem response	18kHz-evoked ABR Threshold	http://www.mousephenotype.org/data/charts?accession=MGI:2142651&allele_accession_id=MGI:6104244&zygosity=homozygote&parameter_stable_id=IMPC_ABR_008_001&pipeline_stable_id=JAX_001&phenotyping_center=JAX
Ptchd1	increased or absent threshold for auditory brainstem response	24kHz-evoked ABR Threshold	http://www.mousephenotype.org/data/charts?accession=MGI:2685233&allele_accession_id=MGI:5763006&zygosity=hemizygote&parameter_stable_id=IMPC_ABR_010_001&pipeline_stable_id=ICS_001&phenotyping_center=ICS
Ptchd1	increased or absent threshold for auditory brainstem response	30kHz-evoked ABR Threshold	http://www.mousephenotype.org/data/charts?accession=MGI:2685233&allele_accession_id=MGI:5763006&zygosity=hemizygote&parameter_stable_id=IMPC_ABR_012_001&pipeline_stable_id=ICS_001&phenotyping_center=ICS
Rab10	decreased threshold for auditory brainstem response	30kHz-evoked ABR Threshold	http://www.mousephenotype.org/data/charts?accession=MGI:105066&allele_accession_id=MGI:5907845&zygosity=heterozygote&parameter_stable_id=IMPC_ABR_012_001&pipeline_stable_id=JAX_001&phenotyping_center=JAX
Rab11fip3	increased or absent threshold for auditory brainstem response	6kHz-evoked ABR Threshold	http://www.mousephenotype.org/data/charts?accession=MGI:2444431&allele_accession_id=MGI:5755639&zygosity=homozygote&parameter_stable_id=IMPC_ABR_004_001&pipeline_stable_id=JAX_001&phenotyping_center=JAX
Rab11fip3	increased or absent threshold for auditory brainstem response	24kHz-evoked ABR Threshold	http://www.mousephenotype.org/data/charts?accession=MGI:2444431&allele_accession_id=MGI:5755639&zygosity=homozygote&parameter_stable_id=IMPC_ABR_010_001&pipeline_stable_id=JAX_001&phenotyping_center=JAX
Rap1gap2	increased or absent threshold for auditory brainstem response	24kHz-evoked ABR Threshold	http://www.mousephenotype.org/data/charts?accession=MGI:3028623&allele_accession_id=MGI:6120805&zygosity=homozygote&parameter_stable_id=IMPC_ABR_010_001&pipeline_stable_id=ICS_001&phenotyping_center=ICS
Rap1gap2	increased or absent threshold for auditory brainstem response	30kHz-evoked ABR Threshold	http://www.mousephenotype.org/data/charts?accession=MGI:3028623&allele_accession_id=MGI:6120805&zygosity=homozygote&parameter_stable_id=IMPC_ABR_012_001&pipeline_stable_id=ICS_001&phenotyping_center=ICS
Rap1gap2	increased or absent threshold for auditory brainstem response	18kHz-evoked ABR Threshold	http://www.mousephenotype.org/data/charts?accession=MGI:3028623&allele_accession_id=MGI:6120805&zygosity=homozygote&parameter_stable_id=IMPC_ABR_008_001&pipeline_stable_id=ICS_001&phenotyping_center=ICS
Reg2	decreased threshold for auditory brainstem response	6kHz-evoked ABR Threshold	http://www.mousephenotype.org/data/charts?accession=MGI:97896&allele_accession_id=MGI:5548968&zygosity=homozygote&parameter_stable_id=IMPC_ABR_004_001&pipeline_stable_id=UCD_001&phenotyping_center=UC Davis
Rest	decreased threshold for auditory brainstem response	18kHz-evoked ABR Threshold	http://www.mousephenotype.org/data/charts?accession=MGI:104897&allele_accession_id=MGI:5692555&zygosity=heterozygote&parameter_stable_id=IMPC_ABR_008_001&pipeline_stable_id=HMGU_001&phenotyping_center=HMGU
Rnf10	increased or absent threshold for auditory brainstem response	12kHz-evoked ABR Threshold	http://www.mousephenotype.org/data/charts?accession=MGI:1859162&allele_accession_id=MGI:5548492&zygosity=homozygote&parameter_stable_id=IMPC_ABR_006_001&pipeline_stable_id=TCP_001&phenotyping_center=TCP
Rnf10	increased or absent threshold for auditory brainstem response	Click-evoked ABR threshold	http://www.mousephenotype.org/data/charts?accession=MGI:1859162&allele_accession_id=MGI:5548492&zygosity=homozygote&parameter_stable_id=IMPC_ABR_002_001&pipeline_stable_id=MGP_001&phenotyping_center=WTSI
Romo1	decreased threshold for auditory brainstem response	24kHz-evoked ABR Threshold	http://www.mousephenotype.org/data/charts?accession=MGI:1914317&allele_accession_id=NULL-1D5D8D3DA&zygosity=heterozygote&parameter_stable_id=IMPC_ABR_010_001&pipeline_stable_id=IMPC_001&phenotyping_center=KMPC
Rsad1	increased or absent threshold for auditory brainstem response	12kHz-evoked ABR Threshold	http://www.mousephenotype.org/data/charts?accession=MGI:3039628&allele_accession_id=MGI:5548890&zygosity=homozygote&parameter_stable_id=IMPC_ABR_006_001&pipeline_stable_id=TCP_001&phenotyping_center=TCP
Rsad1	increased or absent threshold for auditory brainstem response	18kHz-evoked ABR Threshold	http://www.mousephenotype.org/data/charts?accession=MGI:3039628&allele_accession_id=MGI:5548890&zygosity=heterozygote&parameter_stable_id=IMPC_ABR_008_001&pipeline_stable_id=TCP_001&phenotyping_center=TCP
Rsad1	increased or absent threshold for auditory brainstem response	Click-evoked ABR threshold	http://www.mousephenotype.org/data/charts?accession=MGI:3039628&allele_accession_id=MGI:5548890&zygosity=heterozygote&parameter_stable_id=IMPC_ABR_002_001&pipeline_stable_id=TCP_001&phenotyping_center=TCP
Rsad1	increased or absent threshold for auditory brainstem response	12kHz-evoked ABR Threshold	http://www.mousephenotype.org/data/charts?accession=MGI:3039628&allele_accession_id=MGI:5548890&zygosity=heterozygote&parameter_stable_id=IMPC_ABR_006_001&pipeline_stable_id=TCP_001&phenotyping_center=TCP
Rsad1	increased or absent threshold for auditory brainstem response	6kHz-evoked ABR Threshold	http://www.mousephenotype.org/data/charts?accession=MGI:3039628&allele_accession_id=MGI:5548890&zygosity=heterozygote&parameter_stable_id=IMPC_ABR_004_001&pipeline_stable_id=TCP_001&phenotyping_center=TCP
Scaper	increased or absent threshold for auditory brainstem response	6kHz-evoked ABR Threshold	http://www.mousephenotype.org/data/charts?accession=MGI:1925976&allele_accession_id=MGI:5792557&zygosity=homozygote&parameter_stable_id=IMPC_ABR_004_001&pipeline_stable_id=ICS_001&phenotyping_center=ICS
Selenok	increased or absent threshold for auditory brainstem response	30kHz-evoked ABR Threshold	http://www.mousephenotype.org/data/charts?accession=MGI:1931466&allele_accession_id=MGI:5548722&zygosity=homozygote&parameter_stable_id=IMPC_ABR_012_001&pipeline_stable_id=MGP_001&phenotyping_center=WTSI
Skida1	increased or absent threshold for auditory brainstem response	24kHz-evoked ABR Threshold	http://www.mousephenotype.org/data/charts?accession=MGI:1919918&allele_accession_id=MGI:5548624&zygosity=heterozygote&parameter_stable_id=IMPC_ABR_010_001&pipeline_stable_id=TCP_001&phenotyping_center=TCP
Slc4a10	increased or absent threshold for auditory brainstem response	6kHz-evoked ABR Threshold	http://www.mousephenotype.org/data/charts?accession=MGI:2150150&allele_accession_id=MGI:5692790&zygosity=homozygote&parameter_stable_id=IMPC_ABR_004_001&pipeline_stable_id=HRWL_001&phenotyping_center=MRC Harwell
Slc4a10	increased or absent threshold for auditory brainstem response	18kHz-evoked ABR Threshold	http://www.mousephenotype.org/data/charts?accession=MGI:2150150&allele_accession_id=MGI:5692790&zygosity=homozygote&parameter_stable_id=IMPC_ABR_008_001&pipeline_stable_id=HRWL_001&phenotyping_center=MRC Harwell
Slc4a10	increased or absent threshold for auditory brainstem response	24kHz-evoked ABR Threshold	http://www.mousephenotype.org/data/charts?accession=MGI:2150150&allele_accession_id=MGI:5692790&zygosity=homozygote&parameter_stable_id=IMPC_ABR_010_001&pipeline_stable_id=HRWL_001&phenotyping_center=MRC Harwell
Snx29	decreased threshold for auditory brainstem response	6kHz-evoked ABR Threshold	http://www.mousephenotype.org/data/charts?accession=MGI:1921728&allele_accession_id=MGI:5548647&zygosity=homozygote&parameter_stable_id=IMPC_ABR_004_001&pipeline_stable_id=ICS_001&phenotyping_center=ICS
Srsf7	increased or absent threshold for auditory brainstem response	30kHz-evoked ABR Threshold	http://www.mousephenotype.org/data/charts?accession=MGI:1926232&allele_accession_id=MGI:4433826&zygosity=heterozygote&parameter_stable_id=IMPC_ABR_012_001&pipeline_stable_id=MGP_001&phenotyping_center=WTSI
Stim2	decreased threshold for auditory brainstem response	30kHz-evoked ABR Threshold	http://www.mousephenotype.org/data/charts?accession=MGI:2151156&allele_accession_id=MGI:5634802&zygosity=heterozygote&parameter_stable_id=IMPC_ABR_012_001&pipeline_stable_id=JAX_001&phenotyping_center=JAX
Sun1	increased or absent threshold for auditory brainstem response	24kHz-evoked ABR Threshold	http://www.mousephenotype.org/data/charts?accession=MGI:1924303&allele_accession_id=MGI:5793071&zygosity=homozygote&parameter_stable_id=IMPC_ABR_010_001&pipeline_stable_id=ICS_001&phenotyping_center=ICS
Sun1	increased or absent threshold for auditory brainstem response	18kHz-evoked ABR Threshold	http://www.mousephenotype.org/data/charts?accession=MGI:1924303&allele_accession_id=MGI:5793071&zygosity=homozygote&parameter_stable_id=IMPC_ABR_008_001&pipeline_stable_id=ICS_001&phenotyping_center=ICS
Sun1	increased or absent threshold for auditory brainstem response	6kHz-evoked ABR Threshold	http://www.mousephenotype.org/data/charts?accession=MGI:1924303&allele_accession_id=MGI:5793071&zygosity=homozygote&parameter_stable_id=IMPC_ABR_004_001&pipeline_stable_id=ICS_001&phenotyping_center=ICS
Sun1	increased or absent threshold for auditory brainstem response	12kHz-evoked ABR Threshold	http://www.mousephenotype.org/data/charts?accession=MGI:1924303&allele_accession_id=MGI:5793071&zygosity=homozygote&parameter_stable_id=IMPC_ABR_006_001&pipeline_stable_id=ICS_001&phenotyping_center=ICS
Sun1	increased or absent threshold for auditory brainstem response	30kHz-evoked ABR Threshold	http://www.mousephenotype.org/data/charts?accession=MGI:1924303&allele_accession_id=MGI:5793071&zygosity=homozygote&parameter_stable_id=IMPC_ABR_012_001&pipeline_stable_id=ICS_001&phenotyping_center=ICS
Tle4	increased or absent threshold for auditory brainstem response	18kHz-evoked ABR Threshold	http://www.mousephenotype.org/data/charts?accession=MGI:104633&allele_accession_id=MGI:6152659&zygosity=homozygote&parameter_stable_id=IMPC_ABR_008_001&pipeline_stable_id=UCD_001&phenotyping_center=UC Davis
Tmco6	increased or absent threshold for auditory brainstem response	24kHz-evoked ABR Threshold	http://www.mousephenotype.org/data/charts?accession=MGI:1919233&allele_accession_id=MGI:5698471&zygosity=homozygote&parameter_stable_id=IMPC_ABR_010_001&pipeline_stable_id=JAX_001&phenotyping_center=JAX
Tmco6	increased or absent threshold for auditory brainstem response	6kHz-evoked ABR Threshold	http://www.mousephenotype.org/data/charts?accession=MGI:1919233&allele_accession_id=MGI:5698471&zygosity=homozygote&parameter_stable_id=IMPC_ABR_004_001&pipeline_stable_id=JAX_001&phenotyping_center=JAX
Tmco6	increased or absent threshold for auditory brainstem response	12kHz-evoked ABR Threshold	http://www.mousephenotype.org/data/charts?accession=MGI:1919233&allele_accession_id=MGI:5698471&zygosity=homozygote&parameter_stable_id=IMPC_ABR_006_001&pipeline_stable_id=JAX_001&phenotyping_center=JAX
Tmco6	increased or absent threshold for auditory brainstem response	18kHz-evoked ABR Threshold	http://www.mousephenotype.org/data/charts?accession=MGI:1919233&allele_accession_id=MGI:5698471&zygosity=homozygote&parameter_stable_id=IMPC_ABR_008_001&pipeline_stable_id=JAX_001&phenotyping_center=JAX
Tmem30b	increased or absent threshold for auditory brainstem response	12kHz-evoked ABR Threshold	http://www.mousephenotype.org/data/charts?accession=MGI:2442082&allele_accession_id=MGI:5692820&zygosity=homozygote&parameter_stable_id=IMPC_ABR_006_001&pipeline_stable_id=UCD_001&phenotyping_center=UC Davis
Tmem30b	increased or absent threshold for auditory brainstem response	18kHz-evoked ABR Threshold	http://www.mousephenotype.org/data/charts?accession=MGI:2442082&allele_accession_id=MGI:5692820&zygosity=homozygote&parameter_stable_id=IMPC_ABR_008_001&pipeline_stable_id=UCD_001&phenotyping_center=UC Davis
Tmem30b	increased or absent threshold for auditory brainstem response	30kHz-evoked ABR Threshold	http://www.mousephenotype.org/data/charts?accession=MGI:2442082&allele_accession_id=MGI:5692820&zygosity=homozygote&parameter_stable_id=IMPC_ABR_012_001&pipeline_stable_id=UCD_001&phenotyping_center=UC Davis
Tmem30b	increased or absent threshold for auditory brainstem response	24kHz-evoked ABR Threshold	http://www.mousephenotype.org/data/charts?accession=MGI:2442082&allele_accession_id=MGI:5692820&zygosity=homozygote&parameter_stable_id=IMPC_ABR_010_001&pipeline_stable_id=UCD_001&phenotyping_center=UC Davis
Tmem51	increased or absent threshold for auditory brainstem response	18kHz-evoked ABR Threshold	http://www.mousephenotype.org/data/charts?accession=MGI:2384874&allele_accession_id=MGI:5792558&zygosity=homozygote&parameter_stable_id=IMPC_ABR_008_001&pipeline_stable_id=HRWL_001&phenotyping_center=MRC Harwell
Tmem51	increased or absent threshold for auditory brainstem response	24kHz-evoked ABR Threshold	http://www.mousephenotype.org/data/charts?accession=MGI:2384874&allele_accession_id=MGI:5792558&zygosity=homozygote&parameter_stable_id=IMPC_ABR_010_001&pipeline_stable_id=HRWL_001&phenotyping_center=MRC Harwell
Tmem51	increased or absent threshold for auditory brainstem response	12kHz-evoked ABR Threshold	http://www.mousephenotype.org/data/charts?accession=MGI:2384874&allele_accession_id=MGI:5792558&zygosity=homozygote&parameter_stable_id=IMPC_ABR_006_001&pipeline_stable_id=HRWL_001&phenotyping_center=MRC Harwell
Tmem51	increased or absent threshold for auditory brainstem response	Click-evoked ABR threshold	http://www.mousephenotype.org/data/charts?accession=MGI:2384874&allele_accession_id=MGI:5792558&zygosity=homozygote&parameter_stable_id=IMPC_ABR_002_001&pipeline_stable_id=HRWL_001&phenotyping_center=MRC Harwell
Tmprss2	increased or absent threshold for auditory brainstem response	24kHz-evoked ABR Threshold	http://www.mousephenotype.org/data/charts?accession=MGI:1354381&allele_accession_id=MGI:5812917&zygosity=homozygote&parameter_stable_id=IMPC_ABR_010_001&pipeline_stable_id=ICS_001&phenotyping_center=ICS
Tmtc4	increased or absent threshold for auditory brainstem response	12kHz-evoked ABR Threshold	http://www.mousephenotype.org/data/charts?accession=MGI:1921050&allele_accession_id=MGI:5708220&zygosity=homozygote&parameter_stable_id=IMPC_ABR_006_001&pipeline_stable_id=UCD_001&phenotyping_center=UC Davis
Tmtc4	increased or absent threshold for auditory brainstem response	6kHz-evoked ABR Threshold	http://www.mousephenotype.org/data/charts?accession=MGI:1921050&allele_accession_id=MGI:5708220&zygosity=homozygote&parameter_stable_id=IMPC_ABR_004_001&pipeline_stable_id=UCD_001&phenotyping_center=UC Davis
Tmtc4	increased or absent threshold for auditory brainstem response	18kHz-evoked ABR Threshold	http://www.mousephenotype.org/data/charts?accession=MGI:1921050&allele_accession_id=MGI:5708220&zygosity=homozygote&parameter_stable_id=IMPC_ABR_008_001&pipeline_stable_id=UCD_001&phenotyping_center=UC Davis
Tmtc4	increased or absent threshold for auditory brainstem response	30kHz-evoked ABR Threshold	http://www.mousephenotype.org/data/charts?accession=MGI:1921050&allele_accession_id=MGI:5708220&zygosity=homozygote&parameter_stable_id=IMPC_ABR_012_001&pipeline_stable_id=UCD_001&phenotyping_center=UC Davis
Tmtc4	increased or absent threshold for auditory brainstem response	24kHz-evoked ABR Threshold	http://www.mousephenotype.org/data/charts?accession=MGI:1921050&allele_accession_id=MGI:5708220&zygosity=homozygote&parameter_stable_id=IMPC_ABR_010_001&pipeline_stable_id=UCD_001&phenotyping_center=UC Davis
Tox	increased or absent threshold for auditory brainstem response	12kHz-evoked ABR Threshold	http://www.mousephenotype.org/data/charts?accession=MGI:2181659&allele_accession_id=MGI:5605811&zygosity=homozygote&parameter_stable_id=IMPC_ABR_006_001&pipeline_stable_id=UCD_001&phenotyping_center=UC Davis
Tox	increased or absent threshold for auditory brainstem response	6kHz-evoked ABR Threshold	http://www.mousephenotype.org/data/charts?accession=MGI:2181659&allele_accession_id=MGI:5605811&zygosity=homozygote&parameter_stable_id=IMPC_ABR_004_001&pipeline_stable_id=UCD_001&phenotyping_center=UC Davis
Tox	increased or absent threshold for auditory brainstem response	18kHz-evoked ABR Threshold	http://www.mousephenotype.org/data/charts?accession=MGI:2181659&allele_accession_id=MGI:5605811&zygosity=homozygote&parameter_stable_id=IMPC_ABR_008_001&pipeline_stable_id=UCD_001&phenotyping_center=UC Davis
Tox	increased or absent threshold for auditory brainstem response	30kHz-evoked ABR Threshold	http://www.mousephenotype.org/data/charts?accession=MGI:2181659&allele_accession_id=MGI:5605811&zygosity=homozygote&parameter_stable_id=IMPC_ABR_012_001&pipeline_stable_id=UCD_001&phenotyping_center=UC Davis
Tox	increased or absent threshold for auditory brainstem response	24kHz-evoked ABR Threshold	http://www.mousephenotype.org/data/charts?accession=MGI:2181659&allele_accession_id=MGI:5605811&zygosity=homozygote&parameter_stable_id=IMPC_ABR_010_001&pipeline_stable_id=UCD_001&phenotyping_center=UC Davis
Tprn	increased or absent threshold for auditory brainstem response	18kHz-evoked ABR Threshold	http://www.mousephenotype.org/data/charts?accession=MGI:2139535&allele_accession_id=MGI:5445918&zygosity=homozygote&parameter_stable_id=IMPC_ABR_008_001&pipeline_stable_id=JAX_001&phenotyping_center=JAX
Tprn	increased or absent threshold for auditory brainstem response	24kHz-evoked ABR Threshold	http://www.mousephenotype.org/data/charts?accession=MGI:2139535&allele_accession_id=MGI:5445918&zygosity=homozygote&parameter_stable_id=IMPC_ABR_010_001&pipeline_stable_id=JAX_001&phenotyping_center=JAX
Tprn	increased or absent threshold for auditory brainstem response	12kHz-evoked ABR Threshold	http://www.mousephenotype.org/data/charts?accession=MGI:2139535&allele_accession_id=MGI:5445918&zygosity=homozygote&parameter_stable_id=IMPC_ABR_006_001&pipeline_stable_id=JAX_001&phenotyping_center=JAX
Tprn	increased or absent threshold for auditory brainstem response	30kHz-evoked ABR Threshold	http://www.mousephenotype.org/data/charts?accession=MGI:2139535&allele_accession_id=MGI:5445918&zygosity=homozygote&parameter_stable_id=IMPC_ABR_012_001&pipeline_stable_id=JAX_001&phenotyping_center=JAX
Tprn	increased or absent threshold for auditory brainstem response	6kHz-evoked ABR Threshold	http://www.mousephenotype.org/data/charts?accession=MGI:2139535&allele_accession_id=MGI:5445918&zygosity=homozygote&parameter_stable_id=IMPC_ABR_004_001&pipeline_stable_id=JAX_001&phenotyping_center=JAX
Tram2	increased or absent threshold for auditory brainstem response	6kHz-evoked ABR Threshold	http://www.mousephenotype.org/data/charts?accession=MGI:1924817&allele_accession_id=MGI:4949327&zygosity=homozygote&parameter_stable_id=IMPC_ABR_004_001&pipeline_stable_id=MGP_001&phenotyping_center=WTSI
Tram2	increased or absent threshold for auditory brainstem response	12kHz-evoked ABR Threshold	http://www.mousephenotype.org/data/charts?accession=MGI:1924817&allele_accession_id=MGI:4949327&zygosity=homozygote&parameter_stable_id=IMPC_ABR_006_001&pipeline_stable_id=MGP_001&phenotyping_center=WTSI
Tram2	increased or absent threshold for auditory brainstem response	24kHz-evoked ABR Threshold	http://www.mousephenotype.org/data/charts?accession=MGI:1924817&allele_accession_id=MGI:4949327&zygosity=homozygote&parameter_stable_id=IMPC_ABR_010_001&pipeline_stable_id=MGP_001&phenotyping_center=WTSI
Tram2	increased or absent threshold for auditory brainstem response	30kHz-evoked ABR Threshold	http://www.mousephenotype.org/data/charts?accession=MGI:1924817&allele_accession_id=MGI:4949327&zygosity=homozygote&parameter_stable_id=IMPC_ABR_012_001&pipeline_stable_id=MGP_001&phenotyping_center=WTSI
Tram2	increased or absent threshold for auditory brainstem response	Click-evoked ABR threshold	http://www.mousephenotype.org/data/charts?accession=MGI:1924817&allele_accession_id=MGI:4949327&zygosity=homozygote&parameter_stable_id=IMPC_ABR_002_001&pipeline_stable_id=MGP_001&phenotyping_center=WTSI
Tram2	increased or absent threshold for auditory brainstem response	18kHz-evoked ABR Threshold	http://www.mousephenotype.org/data/charts?accession=MGI:1924817&allele_accession_id=MGI:4949327&zygosity=homozygote&parameter_stable_id=IMPC_ABR_008_001&pipeline_stable_id=MGP_001&phenotyping_center=WTSI
Trim37	increased or absent threshold for auditory brainstem response	24kHz-evoked ABR Threshold	http://www.mousephenotype.org/data/charts?accession=MGI:2153072&allele_accession_id=NULL-CD41D954E&zygosity=homozygote&parameter_stable_id=IMPC_ABR_010_001&pipeline_stable_id=IMPC_001&phenotyping_center=MARC
Trim37	increased or absent threshold for auditory brainstem response	30kHz-evoked ABR Threshold	http://www.mousephenotype.org/data/charts?accession=MGI:2153072&allele_accession_id=NULL-CD41D954E&zygosity=homozygote&parameter_stable_id=IMPC_ABR_012_001&pipeline_stable_id=IMPC_001&phenotyping_center=MARC
Tssk4	decreased threshold for auditory brainstem response	12kHz-evoked ABR Threshold	http://www.mousephenotype.org/data/charts?accession=MGI:1918349&allele_accession_id=MGI:5907824&zygosity=homozygote&parameter_stable_id=IMPC_ABR_006_001&pipeline_stable_id=JAX_001&phenotyping_center=JAX
Ube2g1	increased or absent threshold for auditory brainstem response	12kHz-evoked ABR Threshold	http://www.mousephenotype.org/data/charts?accession=MGI:1914378&allele_accession_id=MGI:5577267&zygosity=homozygote&parameter_stable_id=IMPC_ABR_006_001&pipeline_stable_id=IMPC_001&phenotyping_center=RBRC
Ube2g1	increased or absent threshold for auditory brainstem response	Click-evoked ABR threshold	http://www.mousephenotype.org/data/charts?accession=MGI:1914378&allele_accession_id=MGI:5577267&zygosity=homozygote&parameter_stable_id=IMPC_ABR_002_001&pipeline_stable_id=IMPC_001&phenotyping_center=RBRC
Ube2g1	increased or absent threshold for auditory brainstem response	6kHz-evoked ABR Threshold	http://www.mousephenotype.org/data/charts?accession=MGI:1914378&allele_accession_id=MGI:5577267&zygosity=homozygote&parameter_stable_id=IMPC_ABR_004_001&pipeline_stable_id=IMPC_001&phenotyping_center=RBRC
Ube2w	increased or absent threshold for auditory brainstem response	Click-evoked ABR threshold	http://www.mousephenotype.org/data/charts?accession=MGI:1914049&allele_accession_id=MGI:5605776&zygosity=homozygote&parameter_stable_id=IMPC_ABR_002_001&pipeline_stable_id=IMPC_001&phenotyping_center=MARC
Ube2w	increased or absent threshold for auditory brainstem response	6kHz-evoked ABR Threshold	http://www.mousephenotype.org/data/charts?accession=MGI:1914049&allele_accession_id=MGI:5605776&zygosity=homozygote&parameter_stable_id=IMPC_ABR_004_001&pipeline_stable_id=IMPC_001&phenotyping_center=MARC
Ube2w	increased or absent threshold for auditory brainstem response	24kHz-evoked ABR Threshold	http://www.mousephenotype.org/data/charts?accession=MGI:1914049&allele_accession_id=MGI:5605776&zygosity=homozygote&parameter_stable_id=IMPC_ABR_010_001&pipeline_stable_id=IMPC_001&phenotyping_center=MARC
Ubiad1	increased or absent threshold for auditory brainstem response	30kHz-evoked ABR Threshold	http://www.mousephenotype.org/data/charts?accession=MGI:1918957&allele_accession_id=MGI:5896808&zygosity=heterozygote&parameter_stable_id=IMPC_ABR_012_001&pipeline_stable_id=JAX_001&phenotyping_center=JAX
Ush1c	increased or absent threshold for auditory brainstem response	6kHz-evoked ABR Threshold	http://www.mousephenotype.org/data/charts?accession=MGI:1919338&allele_accession_id=MGI:4363497&zygosity=homozygote&parameter_stable_id=IMPC_ABR_004_001&pipeline_stable_id=MGP_001&phenotyping_center=WTSI
Ush1c	increased or absent threshold for auditory brainstem response	24kHz-evoked ABR Threshold	http://www.mousephenotype.org/data/charts?accession=MGI:1919338&allele_accession_id=MGI:4363497&zygosity=homozygote&parameter_stable_id=IMPC_ABR_010_001&pipeline_stable_id=MGP_001&phenotyping_center=WTSI
Ush1c	increased or absent threshold for auditory brainstem response	30kHz-evoked ABR Threshold	http://www.mousephenotype.org/data/charts?accession=MGI:1919338&allele_accession_id=MGI:4363497&zygosity=homozygote&parameter_stable_id=IMPC_ABR_012_001&pipeline_stable_id=MGP_001&phenotyping_center=WTSI
Ush1c	increased or absent threshold for auditory brainstem response	12kHz-evoked ABR Threshold	http://www.mousephenotype.org/data/charts?accession=MGI:1919338&allele_accession_id=MGI:4363497&zygosity=homozygote&parameter_stable_id=IMPC_ABR_006_001&pipeline_stable_id=MGP_001&phenotyping_center=WTSI
Ush1c	increased or absent threshold for auditory brainstem response	Click-evoked ABR threshold	http://www.mousephenotype.org/data/charts?accession=MGI:1919338&allele_accession_id=MGI:4363497&zygosity=homozygote&parameter_stable_id=IMPC_ABR_002_001&pipeline_stable_id=MGP_001&phenotyping_center=WTSI
Ush1c	increased or absent threshold for auditory brainstem response	18kHz-evoked ABR Threshold	http://www.mousephenotype.org/data/charts?accession=MGI:1919338&allele_accession_id=MGI:4363497&zygosity=homozygote&parameter_stable_id=IMPC_ABR_008_001&pipeline_stable_id=MGP_001&phenotyping_center=WTSI
Usp30	increased or absent threshold for auditory brainstem response	Click-evoked ABR threshold	http://www.mousephenotype.org/data/charts?accession=MGI:2140991&allele_accession_id=NULL-4284AABB3&zygosity=homozygote&parameter_stable_id=IMPC_ABR_002_001&pipeline_stable_id=IMPC_001&phenotyping_center=MARC
Usp30	increased or absent threshold for auditory brainstem response	6kHz-evoked ABR Threshold	http://www.mousephenotype.org/data/charts?accession=MGI:2140991&allele_accession_id=NULL-4284AABB3&zygosity=homozygote&parameter_stable_id=IMPC_ABR_004_001&pipeline_stable_id=IMPC_001&phenotyping_center=MARC
Usp30	increased or absent threshold for auditory brainstem response	18kHz-evoked ABR Threshold	http://www.mousephenotype.org/data/charts?accession=MGI:2140991&allele_accession_id=NULL-4284AABB3&zygosity=homozygote&parameter_stable_id=IMPC_ABR_008_001&pipeline_stable_id=IMPC_001&phenotyping_center=MARC
Usp30	increased or absent threshold for auditory brainstem response	24kHz-evoked ABR Threshold	http://www.mousephenotype.org/data/charts?accession=MGI:2140991&allele_accession_id=NULL-4284AABB3&zygosity=homozygote&parameter_stable_id=IMPC_ABR_010_001&pipeline_stable_id=IMPC_001&phenotyping_center=MARC
Usp32	increased or absent threshold for auditory brainstem response	30kHz-evoked ABR Threshold	http://www.mousephenotype.org/data/charts?accession=MGI:2144475&allele_accession_id=NULL-19D18244C&zygosity=heterozygote&parameter_stable_id=IMPC_ABR_012_001&pipeline_stable_id=IMPC_001&phenotyping_center=MARC
Usp43	increased or absent threshold for auditory brainstem response	24kHz-evoked ABR Threshold	http://www.mousephenotype.org/data/charts?accession=MGI:2444541&allele_accession_id=NULL-D6D45ED7C&zygosity=homozygote&parameter_stable_id=IMPC_ABR_010_001&pipeline_stable_id=IMPC_001&phenotyping_center=MARC
Ust	increased or absent threshold for auditory brainstem response	18kHz-evoked ABR Threshold	http://www.mousephenotype.org/data/charts?accession=MGI:2442406&allele_accession_id=MGI:5749738&zygosity=heterozygote&parameter_stable_id=IMPC_ABR_008_001&pipeline_stable_id=JAX_001&phenotyping_center=JAX
Wdr45	increased or absent threshold for auditory brainstem response	18kHz-evoked ABR Threshold	http://www.mousephenotype.org/data/charts?accession=MGI:1859606&allele_accession_id=MGI:5779851&zygosity=homozygote&parameter_stable_id=IMPC_ABR_008_001&pipeline_stable_id=JAX_001&phenotyping_center=JAX
Wdr45	increased or absent threshold for auditory brainstem response	18kHz-evoked ABR Threshold	http://www.mousephenotype.org/data/charts?accession=MGI:1859606&allele_accession_id=MGI:5779851&zygosity=hemizygote&parameter_stable_id=IMPC_ABR_008_001&pipeline_stable_id=JAX_001&phenotyping_center=JAX
Zdhhc11	decreased threshold for auditory brainstem response	6kHz-evoked ABR Threshold	http://www.mousephenotype.org/data/charts?accession=MGI:1918414&allele_accession_id=MGI:5445927&zygosity=homozygote&parameter_stable_id=IMPC_ABR_004_001&pipeline_stable_id=JAX_001&phenotyping_center=JAX
Zdhhc11	decreased threshold for auditory brainstem response	18kHz-evoked ABR Threshold	http://www.mousephenotype.org/data/charts?accession=MGI:1918414&allele_accession_id=MGI:5445927&zygosity=homozygote&parameter_stable_id=IMPC_ABR_008_001&pipeline_stable_id=JAX_001&phenotyping_center=JAX
Zfp119a	increased or absent threshold for auditory brainstem response	24kHz-evoked ABR Threshold	http://www.mousephenotype.org/data/charts?accession=MGI:1345189&allele_accession_id=MGI:5548456&zygosity=homozygote&parameter_stable_id=IMPC_ABR_010_001&pipeline_stable_id=HMGU_001&phenotyping_center=HMGU
Zfp445	increased or absent threshold for auditory brainstem response	24kHz-evoked ABR Threshold	http://www.mousephenotype.org/data/charts?accession=MGI:2143340&allele_accession_id=MGI:5613658&zygosity=heterozygote&parameter_stable_id=IMPC_ABR_010_001&pipeline_stable_id=HMGU_001&phenotyping_center=HMGU
Zfp719	increased or absent threshold for auditory brainstem response	Click-evoked ABR threshold	http://www.mousephenotype.org/data/charts?accession=MGI:2444708&allele_accession_id=MGI:5548829&zygosity=homozygote&parameter_stable_id=IMPC_ABR_002_001&pipeline_stable_id=MGP_001&phenotyping_center=WTSI
Zfp719	increased or absent threshold for auditory brainstem response	6kHz-evoked ABR Threshold	http://www.mousephenotype.org/data/charts?accession=MGI:2444708&allele_accession_id=MGI:5548829&zygosity=homozygote&parameter_stable_id=IMPC_ABR_004_001&pipeline_stable_id=MGP_001&phenotyping_center=WTSI
Zfp719	increased or absent threshold for auditory brainstem response	12kHz-evoked ABR Threshold	http://www.mousephenotype.org/data/charts?accession=MGI:2444708&allele_accession_id=MGI:5548829&zygosity=homozygote&parameter_stable_id=IMPC_ABR_006_001&pipeline_stable_id=MGP_001&phenotyping_center=WTSI
Zfp719	increased or absent threshold for auditory brainstem response	18kHz-evoked ABR Threshold	http://www.mousephenotype.org/data/charts?accession=MGI:2444708&allele_accession_id=MGI:5548829&zygosity=homozygote&parameter_stable_id=IMPC_ABR_008_001&pipeline_stable_id=MGP_001&phenotyping_center=WTSI
Zfp719	increased or absent threshold for auditory brainstem response	24kHz-evoked ABR Threshold	http://www.mousephenotype.org/data/charts?accession=MGI:2444708&allele_accession_id=MGI:5548829&zygosity=homozygote&parameter_stable_id=IMPC_ABR_010_001&pipeline_stable_id=MGP_001&phenotyping_center=WTSI
Zfp719	increased or absent threshold for auditory brainstem response	30kHz-evoked ABR Threshold	http://www.mousephenotype.org/data/charts?accession=MGI:2444708&allele_accession_id=MGI:5548829&zygosity=homozygote&parameter_stable_id=IMPC_ABR_012_001&pipeline_stable_id=MGP_001&phenotyping_center=WTSI
Zfp719	increased or absent threshold for auditory brainstem response	Click-evoked ABR threshold	http://www.mousephenotype.org/data/charts?accession=MGI:2444708&allele_accession_id=MGI:4431958&zygosity=homozygote&parameter_stable_id=IMPC_ABR_002_001&pipeline_stable_id=MGP_001&phenotyping_center=WTSI
Zfp719	increased or absent threshold for auditory brainstem response	6kHz-evoked ABR Threshold	http://www.mousephenotype.org/data/charts?accession=MGI:2444708&allele_accession_id=MGI:4431958&zygosity=homozygote&parameter_stable_id=IMPC_ABR_004_001&pipeline_stable_id=MGP_001&phenotyping_center=WTSI
Zfp719	increased or absent threshold for auditory brainstem response	12kHz-evoked ABR Threshold	http://www.mousephenotype.org/data/charts?accession=MGI:2444708&allele_accession_id=MGI:4431958&zygosity=homozygote&parameter_stable_id=IMPC_ABR_006_001&pipeline_stable_id=MGP_001&phenotyping_center=WTSI
Zfp719	increased or absent threshold for auditory brainstem response	18kHz-evoked ABR Threshold	http://www.mousephenotype.org/data/charts?accession=MGI:2444708&allele_accession_id=MGI:4431958&zygosity=homozygote&parameter_stable_id=IMPC_ABR_008_001&pipeline_stable_id=MGP_001&phenotyping_center=WTSI
Zfp719	increased or absent threshold for auditory brainstem response	24kHz-evoked ABR Threshold	http://www.mousephenotype.org/data/charts?accession=MGI:2444708&allele_accession_id=MGI:4431958&zygosity=homozygote&parameter_stable_id=IMPC_ABR_010_001&pipeline_stable_id=MGP_001&phenotyping_center=WTSI
Zfp719	increased or absent threshold for auditory brainstem response	30kHz-evoked ABR Threshold	http://www.mousephenotype.org/data/charts?accession=MGI:2444708&allele_accession_id=MGI:4431958&zygosity=homozygote&parameter_stable_id=IMPC_ABR_012_001&pipeline_stable_id=MGP_001&phenotyping_center=WTSI
